# Supplementary material for: Investigating the effect of lifestyle risk factors upon number of aspirated and mature oocytes in in vitro fertilization cycles: Interaction with antral follicle count
Source: PubMed Central journal article supplement (PMC6697332; doi:10.1371/journal.pone.0221015), 2019-08-16
Supplement: pone.0221015.s004.pdf [file pone.0221015.s004.pdf]

---

# LIVSSTIL OCH INFERTILITET

EN STUDIE OM FRUKTSAMHET

---

INSTITUTIONEN FÖR FOLKHÄLSO- OCH VÅRDVETENSKAP

INSTITUTIONEN FÖR KVINNORS OCH BARNNS HÄLSA

UPPSALA UNIVERSITET

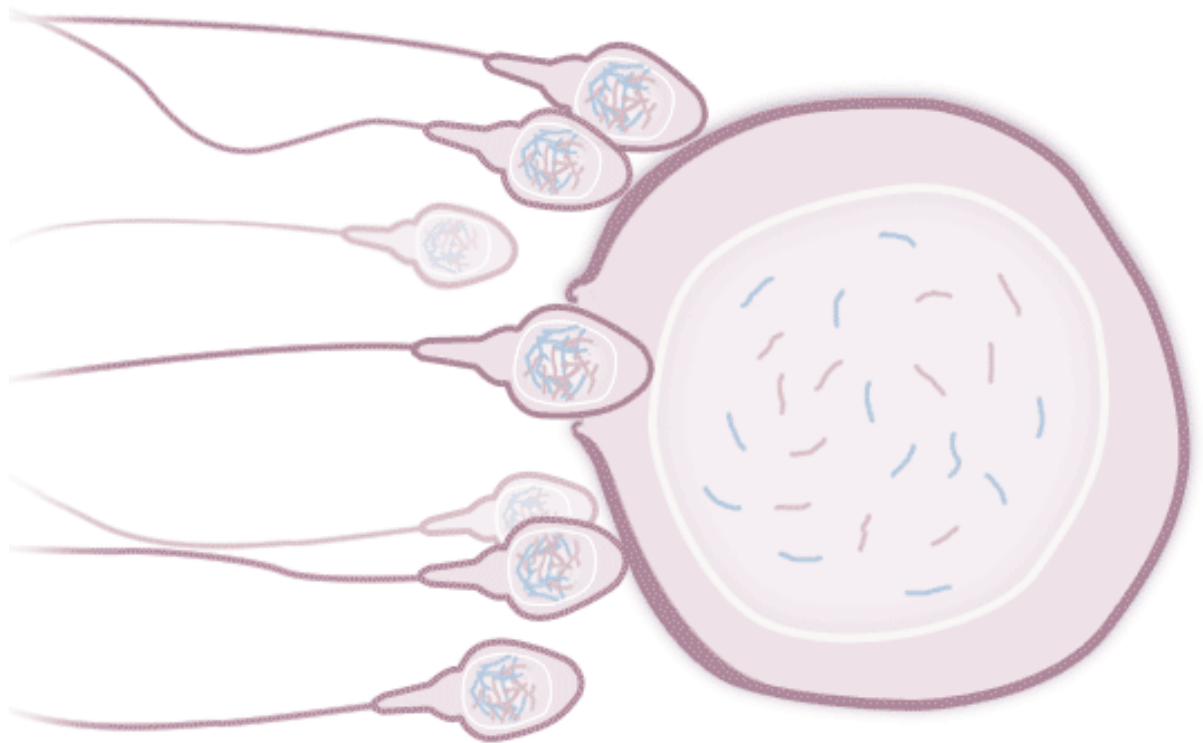



---

# DU TILLFRÅGAS HÄRMED OM ATT DELTA I EN UNDERSÖKNING OM INFERTILITET

---

Syftet med detta projekt är att få mer kunskap om vilka förändringar i livsstil infertila par har gjort för att förbättra chanserna till graviditet samt kvinnans förhållande till sexualitet, psykisk hälsa och välbefinnande vid behandlingsstarten och efter att behandlingen avslutats antingen genom att hon blivit gravid eller därför att man inte har mer att erbjuda. Studien avser öka kunskapen om behovet av rådgivning till infertila par med olika kulturell och socioekonomisk bakgrund. Målet är att fylla de kunskapsluckor som finns idag avseende graviditetsplanering och livsstilsförändringar i samband med infertilitet och graviditet hos kvinnor. Resultaten från studien kan ligga till grund för att utveckla evidensbaserad rådgivning gällande livsstilsfaktorer för par som söker sig till fertilitetsklinikerna, vilket skulle kunna bidra till bättre behandlingsresultat

Vi behöver dina kontaktuppgifter för att kunna återkomma med följdfrågor om hur du mår och hur behandlingen har gått, efter cirka två år. Följdfrågorna avser komplettera den första enkäten med förändringar i och påverkan på livsstil under och efter behandlingsperioden.

Ditt personnummer kommer även att samköras med Medicinska födelseregistret och läkemedelsregistret. Detta endast för att kunna få information om behandlingsresultat, eventuella komplikationer samt eventuell graviditetsutfall. Information kan även insamlas ur journaluppgifter gällande vilka behandlingar du har gått igenom och vad är det för resultat. Dina uppgifter kommer inte att användas i något annat syfte än för detta forskningsprojekt. Resultaten analyseras på gruppnivå och ingen enskild individ kan identifieras. Dina svar kommer inte att kunna kopplas till din person. Ansvarig myndighet för registret är Institutionen för folkhälso- och vårdvetenskap, Uppsala universitet respektive Västmanland läns landsting.

Dina kontaktuppgifter sparas via en kodnyckel och hanteras i enlighet med personuppgiftslagen (PuL). Detta innebär att alla personuppgifter behandlas på ett sådant sätt att den personliga integriteten inte kränks. Allt insamlat material: kodnyckel, enkäter och datafiler handhas bara av projektgruppen och det kommer att förvaras i låsta utrymmen på institutionen för folkhälso- och vårdvetenskap.

Deltagandet i studien är frivilligt. Genom att fylla i ditt personnummer nedan godkänner du att delta i projektet. Tveka inte att ringa eller maila oss om du har frågor, kontaktuppgifterna hittar du nedan. Samtyckesblanketten förvarar vi åtskilt från din enkät. Din enkät får bara ett kodnummer.

Ansvariga samt kontaktpersoner  
för undersökningen är:

**Tanja Tydén** - Leg. barnmorska, med. dr., professor vid  
Institutionen för folkhälso- och vårdvetenskap, Uppsala  
universitet  
Tel. 018-471 66 46 • E-post: [tanja.tyden@pubcare.uu.se](mailto:tanja.tyden@pubcare.uu.se)

**Kjell Wånggren** - Överläkare, med. dr., specialist i obstetrik  
och gynekologi, Reproduktionscentrum och Institutionen för  
kvinnors och barns hälsa, Uppsala universitet  
Tel. 018-611 57 52 • E-post: [kjell.wanggren@kbh.uu.se](mailto:kjell.wanggren@kbh.uu.se)

**Anna Berglund** – Överläkare, med. dr., specialist i obstetrik  
och gynekologi, Nationellt centrum för kvinnofrid, Uppsala  
universitet.  
Tel. 018-611 00 00 • E-post: [anna.berglund@kbh.uu.se](mailto:anna.berglund@kbh.uu.se)

**Lana Salih** – Läkare, specialist i obstetrik och gynekologi,  
Reproduktionscentrum, Kvinnokliniken, Akademiska sjukhuset,  
Uppsala  
Tel. 018-611 00 00. • E-post: [lane.salih@kbh.uu.se](mailto:lane.salih@kbh.uu.se)

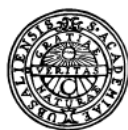

UPPSALA  
UNIVERSITET



# Samtyckesblankett

---

Jag samtycker till att delta i studien om livsstil, hälsa och barnlöshet. Jag har blivit informerad om studien via skriftlig information och fått tillräcklig med tid på mig att överväga mitt deltagande. Jag vet att jag när som helst kan avsluta mitt deltagande i studien.

Jag samtycker till att mina personuppgifter behandlas som beskrivet i patientinformationen och är medveten om att mitt deltagande är helt frivilligt.

Jag får en kopia av patientinformationen och samtyckesblanketten.

Som tack för min medverkan erhåller jag en SF biobiljett.

|               |                      |                      |                      |                      |                      |                      |                      |                      |                      |                      |                      |                      |                      |
|---------------|----------------------|----------------------|----------------------|----------------------|----------------------|----------------------|----------------------|----------------------|----------------------|----------------------|----------------------|----------------------|----------------------|
| Personnummer: | <input type="text"/> | <input type="text"/> | <input type="text"/> | <input type="text"/> | <input type="text"/> | <input type="text"/> | <input type="text"/> | <input type="text"/> | <input type="text"/> | <input type="text"/> | <input type="text"/> | <input type="text"/> | <input type="text"/> |
| Namn:         | .....                |                      |                      |                      |                      |                      |                      |                      |                      |                      |                      |                      |                      |
| Adress:       | .....                |                      |                      |                      |                      |                      |                      |                      |                      |                      |                      |                      |                      |
|               | .....                |                      |                      |                      |                      |                      |                      |                      |                      |                      |                      |                      |                      |
| Mobilnr :     | .....                |                      |                      |                      |                      |                      | Telenr:              | .....                |                      |                      |                      |                      |                      |
| E-post:       | .....                |                      |                      |                      |                      |                      |                      |                      |                      |                      |                      |                      |                      |

Jag föredrar att bli kontaktad/få påminnelser via:

Sms

E-post

Post

Telefonsamtal

*Obs: Denna sida kommer att avlägsnas från enkäten. Dina personuppgifter kommer att förvaras separat.*

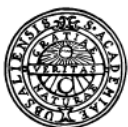

---

UPPSALA  
UNIVERSITET



## ALLMÄNNA FRÅGOR

1. Ange dagens datum: År:..... Månad:..... Dag:.....

2. Hur gammal är du? ..... år gammal

3. Vilken/vilka är din(a) nuvarande sysselsättning(ar)? (Kryssa för alla alternativ som stämmer)

|                                                           | 1-24%                    | 25%                      | 26-49%                   | 50%                      | 51-74%                   | 75%                      | 76-99%                   | 100%                     |
|-----------------------------------------------------------|--------------------------|--------------------------|--------------------------|--------------------------|--------------------------|--------------------------|--------------------------|--------------------------|
| <input type="checkbox"/> Fast anställd/tillsvidare        | <input type="checkbox"/> | <input type="checkbox"/> | <input type="checkbox"/> | <input type="checkbox"/> | <input type="checkbox"/> | <input type="checkbox"/> | <input type="checkbox"/> | <input type="checkbox"/> |
| <input type="checkbox"/> Egen företagare                  | <input type="checkbox"/> | <input type="checkbox"/> | <input type="checkbox"/> | <input type="checkbox"/> | <input type="checkbox"/> | <input type="checkbox"/> | <input type="checkbox"/> | <input type="checkbox"/> |
| <input type="checkbox"/> Tillfälligt anställning/vikariat | <input type="checkbox"/> | <input type="checkbox"/> | <input type="checkbox"/> | <input type="checkbox"/> | <input type="checkbox"/> | <input type="checkbox"/> | <input type="checkbox"/> | <input type="checkbox"/> |
| <input type="checkbox"/> Studerande                       | <input type="checkbox"/> | <input type="checkbox"/> | <input type="checkbox"/> | <input type="checkbox"/> | <input type="checkbox"/> | <input type="checkbox"/> | <input type="checkbox"/> | <input type="checkbox"/> |
| <input type="checkbox"/> Föräldraledig                    | <input type="checkbox"/> | <input type="checkbox"/> | <input type="checkbox"/> | <input type="checkbox"/> | <input type="checkbox"/> | <input type="checkbox"/> | <input type="checkbox"/> | <input type="checkbox"/> |
| <input type="checkbox"/> Sjukskriven                      | <input type="checkbox"/> | <input type="checkbox"/> | <input type="checkbox"/> | <input type="checkbox"/> | <input type="checkbox"/> | <input type="checkbox"/> | <input type="checkbox"/> | <input type="checkbox"/> |
| <input type="checkbox"/> Arbetslös                        | <input type="checkbox"/> | <input type="checkbox"/> | <input type="checkbox"/> | <input type="checkbox"/> | <input type="checkbox"/> | <input type="checkbox"/> | <input type="checkbox"/> | <input type="checkbox"/> |
| <input type="checkbox"/> Hemmafru/sköter hushållet        | <input type="checkbox"/> | <input type="checkbox"/> | <input type="checkbox"/> | <input type="checkbox"/> | <input type="checkbox"/> | <input type="checkbox"/> | <input type="checkbox"/> | <input type="checkbox"/> |
| <input type="checkbox"/> Förtids- /sjukpensionerad        | <input type="checkbox"/> | <input type="checkbox"/> | <input type="checkbox"/> | <input type="checkbox"/> | <input type="checkbox"/> | <input type="checkbox"/> | <input type="checkbox"/> | <input type="checkbox"/> |

4. Vilken är den **högsta** utbildning du har **avslutat**?

- Har inte avslutat någon utbildning
- Grundskola
- Gymnasieskola
- Yrkehögskola eller kvalificerad yrkesutbildning
- Universitet eller högskola – 2,5 år eller kortare
- Universitet eller högskola – 3,5 år
- Universitet eller högskola – Forskarutbildning

5. Hur stor är månadsinkomsten före skatt i ditt hushåll?

(Med inkomst menas lön, a-kassa, sjuk-/föräldrapenning, pension, underhållsstöd, barnbidrag, efterlevandestöd, socialförsäkringsförmåner och andra ersättningar.)

..... kr/månad

6. Hur lång är du? .....cm

7. Hur mycket väger du idag? .....kg

8. Hur mycket vägde du **för ett år sedan**? .....kg

9. a. I vilket land är du född?  Sverige  Annat land: .....
- b. Om du är född i ett annat land än Sverige, hur gammal var du när du kom till Sverige? .....år  Mindre än 1 år gammal
- c. Är du adopterad?  Ja  Nej

10. I vilket land är dina föräldrar födda?

- a. Mamma är född i:  Sverige  Annat land: .....  
 Vet ej
- b. Pappa är född i:  Sverige  Annat land: .....  
 Vet ej

11. Hur bra kan du läsa och förstå skriven svenska?

- |                          |                          |                          |                          |                          |
|--------------------------|--------------------------|--------------------------|--------------------------|--------------------------|
| Mycket bra               | Ganska bra               | Varken bra eller dåligt  | Ganska dåligt            | Mycket dåligt            |
| <input type="checkbox"/> | <input type="checkbox"/> | <input type="checkbox"/> | <input type="checkbox"/> | <input type="checkbox"/> |

12. Hur stor betydelse har religion i ditt liv?

- |                          |                          |                                   |                          |                          |
|--------------------------|--------------------------|-----------------------------------|--------------------------|--------------------------|
| Mycket stor betydelse    | Ganska stor betydelse    | Varken stor eller liten betydelse | Ganska liten betydelse   | Mycket liten betydelse   |
| <input type="checkbox"/> | <input type="checkbox"/> | <input type="checkbox"/>          | <input type="checkbox"/> | <input type="checkbox"/> |



## NÅGRA FRÅGOR OM DIN NUVARANDE PARTNER

---

13. Vilket kön har din nuvarande partner?  Man  Kvinna
14. När är din partner född? År: 19 .....
15. Hur länge har du och din nuvarande partner haft ett förhållande? (*Kryssa för det alternativ som stämmer bäst.*)
- |                          |                          |                          |                          |                          |                          |                          |                          |                          |                          |
|--------------------------|--------------------------|--------------------------|--------------------------|--------------------------|--------------------------|--------------------------|--------------------------|--------------------------|--------------------------|
| mindre än                |                          |                          |                          |                          |                          |                          |                          |                          | 8 år eller mer           |
| 1 år                     | 1 år                     | 2 år                     | 3 år                     | 4 år                     | 5 år                     | 6 år                     | 7 år                     |                          |                          |
| <input type="checkbox"/> | <input type="checkbox"/> | <input type="checkbox"/> | <input type="checkbox"/> | <input type="checkbox"/> | <input type="checkbox"/> | <input type="checkbox"/> | <input type="checkbox"/> | <input type="checkbox"/> | <input type="checkbox"/> |
16. Vilken är din relation till din nuvarande partner? (*Kryssa för alla alternativ som stämmer*)
- Vi har ett förhållande men bor inte tillsammans  Vi är förlovade
- Vi är sambo/bor tillsammans  Vi är gifta
17. a. Har **din nuvarande partner** några egna biologiska barn, som du inte är biologisk förälder till?
- Nej  Ja, 1 barn  Ja, 2 barn  Ja, 3 barn  Ja, 4 barn eller fler
- b. Har **du** några egna biologiska barn, som din nuvarande partner inte är biologisk förälder till?
- Nej  Ja, 1 barn  Ja, 2 barn  Ja, 3 barn  Ja, 4 barn eller fler
18. I vilket land är din partner född?  Sverige  Annat land: .....
- Vet ej
19. Vilken är den **högsta** utbildning din nuvarande partner har **avslutat**?
- Har inte avslutat någon utbildning
- Grundskola
- Gymnasieskola
- Yrkehögskola eller kvalificerad yrkesutbildning
- Universitet eller högskola – 2,5 år eller kortare
- Universitet eller högskola – 3,5 år
- Universitet eller högskola – Forskarutbildning
20. Röker din nuvarande partner?  Nej  Ja, dagligen  Ja, men inte dagligen

21. För följande sju frågor, markera med ett kryss det svar som bäst motsvarar din syn på din nuvarande parrelation.

|                                                                                                          |                          |                          |                          |                          |                          |
|----------------------------------------------------------------------------------------------------------|--------------------------|--------------------------|--------------------------|--------------------------|--------------------------|
| a. Hur bra svarar din partner an mot dina behov i allmänhet?                                             | Inte alls                |                          | Lika bra                 |                          | Fullständigt             |
|                                                                                                          | <input type="checkbox"/> | <input type="checkbox"/> | <input type="checkbox"/> | <input type="checkbox"/> | <input type="checkbox"/> |
| b. Hur tillfredsställd är du i allmänhet med relationen till din partner?                                | Inte alls                |                          | Lika bra                 |                          | Fullständigt             |
|                                                                                                          | <input type="checkbox"/> | <input type="checkbox"/> | <input type="checkbox"/> | <input type="checkbox"/> | <input type="checkbox"/> |
| c. Hur bra är din relation till din partner i allmänhet om du jämför med de flesta andras parrelationer? | Mycket sämre             |                          | Lika bra                 |                          | Mycket bättre            |
|                                                                                                          | <input type="checkbox"/> | <input type="checkbox"/> | <input type="checkbox"/> | <input type="checkbox"/> | <input type="checkbox"/> |
| d. Hur ofta önskar du att du inte hade blivit tillsammans med din partner?                               | Aldrig                   |                          | Lika bra                 |                          | Alltid                   |
|                                                                                                          | <input type="checkbox"/> | <input type="checkbox"/> | <input type="checkbox"/> | <input type="checkbox"/> | <input type="checkbox"/> |
| e. I vilken utsträckning har relationen till din partner motsvarat dina ursprungliga förväntningar?      | Inte alls                |                          | Lika bra                 |                          | Fullständigt             |
|                                                                                                          | <input type="checkbox"/> | <input type="checkbox"/> | <input type="checkbox"/> | <input type="checkbox"/> | <input type="checkbox"/> |
| f. Hur mycket tycker du om din partner?                                                                  | Ytterst lite             |                          | Lika bra                 |                          | Väldigt mycket           |
|                                                                                                          | <input type="checkbox"/> | <input type="checkbox"/> | <input type="checkbox"/> | <input type="checkbox"/> | <input type="checkbox"/> |
| g. Hur många problem har ni i er relation?                                                               | Ytterst få               |                          | Lika bra                 |                          | Väldigt många            |
|                                                                                                          | <input type="checkbox"/> | <input type="checkbox"/> | <input type="checkbox"/> | <input type="checkbox"/> | <input type="checkbox"/> |

## DIN LIVSSTIL FÖR NÄRVARANDE

22. Vilken typ av kost äter du **för närvarande**? (Kryssa för det alternativ som stämmer **bäst** för dig)
- Allsidigt sammansatt kost (Du äter det mesta och undviker inte någon specifik livsmedelsgrupp)
  - Vegetarisk kost
  - Vegankost
  - Undviker vissa livsmedel på grund av födoämnesöverkänslighet
  - Undviker vissa livsmedel av religiösa skäl
  - LCHF-kost (Du äter mat med få kolhydrater men mycket fett)
  - GI-kost (Du äter mat med lågt GI-värde/glykemiskt index)
  - Annan kost, beskriv

---



---



---



---

23. a. Tar du tillskott av folsyra **för närvarande**?

Ja  Nej → *Fortsätt till fråga 24*

b. Om du tar tillskott av folsyra **för närvarande**, när började du ta detta?

|                          |                          |                          |                          |                          |                          |                          |                          |                          |
|--------------------------|--------------------------|--------------------------|--------------------------|--------------------------|--------------------------|--------------------------|--------------------------|--------------------------|
| 0-2 veckor sedan         | 3-4 veckor sedan         | 1-2 månader sedan        | 3-4 månader sedan        | 5-6 månader sedan        | 7-12 månader sedan       | 1-2 år sedan             | 3-4 år sedan             | Mer än 4 år sedan        |
| <input type="checkbox"/> | <input type="checkbox"/> | <input type="checkbox"/> | <input type="checkbox"/> | <input type="checkbox"/> | <input type="checkbox"/> | <input type="checkbox"/> | <input type="checkbox"/> | <input type="checkbox"/> |

c. Under den tiden du har tagit tillskott av folsyra, **hur ofta** har du tagit detta?

|                          |                          |                          |                          |                          |                          |
|--------------------------|--------------------------|--------------------------|--------------------------|--------------------------|--------------------------|
| Minst 5 gånger/vecka     | 3 - 4 gånger/vecka       | 1 - 2 gånger/vecka       | 2 - 3 gånger/månad       | 1 gång/månad             | 1 - 6 gånger/år          |
| <input type="checkbox"/> | <input type="checkbox"/> | <input type="checkbox"/> | <input type="checkbox"/> | <input type="checkbox"/> | <input type="checkbox"/> |

24. a. Tar du tillskott av multivitamin för kvinnor **för närvarande**?

Ja  Nej → *Fortsätt till fråga 25*

b. Om du har tar tillskott av multivitamin för kvinnor **för närvarande**, när började du ta detta? (*Svara i veckor, månader, eller år.*)

|                          |                          |                          |                          |                          |                          |                          |                          |                          |
|--------------------------|--------------------------|--------------------------|--------------------------|--------------------------|--------------------------|--------------------------|--------------------------|--------------------------|
| 0-2 veckor sedan         | 3-4 veckor sedan         | 1-2 månader sedan        | 3-4 månader sedan        | 5-6 månader sedan        | 7-12 månader sedan       | 1-2 år sedan             | 3-4 år sedan             | Mer än 4 år sedan        |
| <input type="checkbox"/> | <input type="checkbox"/> | <input type="checkbox"/> | <input type="checkbox"/> | <input type="checkbox"/> | <input type="checkbox"/> | <input type="checkbox"/> | <input type="checkbox"/> | <input type="checkbox"/> |

c. Under den tiden du har tagit tillskott av multivitamin för kvinnor, **hur ofta** har du tagit detta?

|                          |                          |                          |                          |                          |                          |
|--------------------------|--------------------------|--------------------------|--------------------------|--------------------------|--------------------------|
| Minst 5 gånger/vecka     | 3 - 4 gånger/vecka       | 1 - 2 gånger/vecka       | 2 - 3 gånger/månad       | 1 gång/månad             | 1 - 6 gånger/år          |
| <input type="checkbox"/> | <input type="checkbox"/> | <input type="checkbox"/> | <input type="checkbox"/> | <input type="checkbox"/> | <input type="checkbox"/> |

25. Använder du något receptfritt läkemedel eller naturläkemedel? (*Kryssa för alla alternativ som stämmer*)

Näsdroppar

Medel mot förkylning

Vätskedrivande medel

Smärtstillande eller antiinflammatoriska medel

Lugnande medel

Sömnmedel

Medel mot allergi

Rökavvänjningsmedel (t.ex. nikotintuggummi)

Annat receptfritt läkemedel

Annat naturläkemedel

Nej, använde bara receptbelagda läkemedel

Nej, använde inga läkemedel eller naturläkemedel

26. Hur mycket kaffe dricker du i genomsnitt (1kopp=1,5dl)? (Svara i antal koppar/dag)

|                          |                          |                          |                          |                          |                          |                          |                          |                           |
|--------------------------|--------------------------|--------------------------|--------------------------|--------------------------|--------------------------|--------------------------|--------------------------|---------------------------|
| Färre än 1<br>kopp/dag   | 1<br>kopp/d.             | 2<br>koppar/d.           | 3<br>koppar/d.           | 4<br>koppar/d.           | 5<br>koppar/d.           | 6<br>koppar/d.           | 7<br>koppar/d.           | 8 eller fler<br>koppar/d. |
| <input type="checkbox"/> | <input type="checkbox"/> | <input type="checkbox"/> | <input type="checkbox"/> | <input type="checkbox"/> | <input type="checkbox"/> | <input type="checkbox"/> | <input type="checkbox"/> | <input type="checkbox"/>  |

eller  Dricker inte kaffe

Här följer några frågor om dina alkoholvanor. I dessa frågor används uttrycket "standardglas alkohol".

Ett STANDARDGLAS ALKOHOL motsvarar följande:

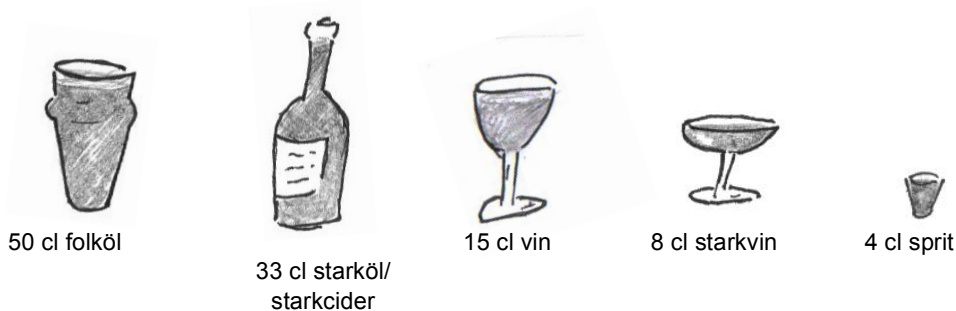

27. a. Dricker du alkohol **för närvarande**? (Kryssa för det alternativ som stämmer **bäst** för dig)

- Ja, jag dricker varje vecka.
- Ja, men inte varje vecka.
- Nej, jag slutade dricka alkohol **när** jag inledde mitt nuvarande graviditetsförsök
- Nej, jag hade slutat dricka alkohol **innan** jag inledde mitt nuvarande graviditetsförsök
- Nej, jag har aldrig druckit alkohol

b. Hur många standardglas alkohol/vecka dricker du i genomsnitt **för närvarande**?

|                          |                          |                          |                          |                          |                          |                          |                          |                          |
|--------------------------|--------------------------|--------------------------|--------------------------|--------------------------|--------------------------|--------------------------|--------------------------|--------------------------|
| Mindre än<br>1 glas/v.   | 1<br>glas/v.             | 2<br>glas/v.             | 3<br>glas/v.             | 4<br>glas/v.             | 5<br>glas/v.             | 6<br>glas/v.             | 7<br>glas/v.             | 8 eller fler<br>glas/v.  |
| <input type="checkbox"/> | <input type="checkbox"/> | <input type="checkbox"/> | <input type="checkbox"/> | <input type="checkbox"/> | <input type="checkbox"/> | <input type="checkbox"/> | <input type="checkbox"/> | <input type="checkbox"/> |

c. Hur många gånger under det senaste **halvåret** har du druckit **fem standardglas eller mer vid ett tillfälle**?

|                          |                          |                          |                          |                          |                          |                          |                          |                          |
|--------------------------|--------------------------|--------------------------|--------------------------|--------------------------|--------------------------|--------------------------|--------------------------|--------------------------|
| 0 ggr                    | 1 gång                   | 2 ggr                    | 3 ggr                    | 4 ggr                    | 5 ggr                    | 6 ggr                    | 7 ggr                    | 8 eller fler<br>gångar   |
| <input type="checkbox"/> | <input type="checkbox"/> | <input type="checkbox"/> | <input type="checkbox"/> | <input type="checkbox"/> | <input type="checkbox"/> | <input type="checkbox"/> | <input type="checkbox"/> | <input type="checkbox"/> |

28. a. Röker du **för närvarande**? (Kryssa för det alternativ som stämmer **bäst** för dig)

- Ja, jag röker varje dag.
- Ja, men inte varje dag.
- Nej, jag har slutat röka → *Fortsätt till fråga 29*
- Nej, jag har aldrig rökt → *Fortsätt till fråga 29*

b. Hur många cigaretter/dag röker du i genomsnitt?

|                          |                          |                          |                          |                          |                          |                          |                          |                          |
|--------------------------|--------------------------|--------------------------|--------------------------|--------------------------|--------------------------|--------------------------|--------------------------|--------------------------|
| färre än 1<br>cigg/dag   | 1<br>cigg/dag            | 2 - 3<br>cigg/dag        | 4 - 5<br>cigg/dag        | 6 - 9<br>cigg/dag        | 10 - 14<br>cigg/dag      | 15 - 20<br>cigg/dag      | 21 - 30<br>cigg/dag      | 31 eller<br>fler cigg/d  |
| <input type="checkbox"/> | <input type="checkbox"/> | <input type="checkbox"/> | <input type="checkbox"/> | <input type="checkbox"/> | <input type="checkbox"/> | <input type="checkbox"/> | <input type="checkbox"/> | <input type="checkbox"/> |

29. a. Snusar du för närvarande?

- Ja, jag snusar varje dag
- Ja, men inte varje dag
- Nej, jag hade slutat snusa sedan tidigare → *Fortsätt till fråga 30*
- Nej, jag har aldrig snusat → *Fortsätt till fråga 30*

b. Hur många portioner snus/dag använder du i genomsnitt **för närvarande**?

|                          |                          |                          |                          |                          |                          |                          |                          |                          |
|--------------------------|--------------------------|--------------------------|--------------------------|--------------------------|--------------------------|--------------------------|--------------------------|--------------------------|
| färre än 1<br>port/dag   | 1<br>port/dag            | 2 - 3<br>port/dag        | 4 - 5<br>port/dag        | 6 - 9<br>port/dag        | 10 - 14<br>port/dag      | 15 - 20<br>port/dag      | 21 - 30<br>port/dag      | 31 eller<br>fler port/d. |
| <input type="checkbox"/> | <input type="checkbox"/> | <input type="checkbox"/> | <input type="checkbox"/> | <input type="checkbox"/> | <input type="checkbox"/> | <input type="checkbox"/> | <input type="checkbox"/> | <input type="checkbox"/> |

30. Använder du nikotinersättningsmedel (*t.ex. nikotintuggummi eller nikotinplåster*) **för närvarande**?

- Ja       Nej

31. Hur många timmar har du i genomsnitt sovitt per dygn en normal vardag den **senaste månaden**?

|                          |                          |                          |                          |                          |                          |                          |                          |                          |
|--------------------------|--------------------------|--------------------------|--------------------------|--------------------------|--------------------------|--------------------------|--------------------------|--------------------------|
| 5 eller<br>färre tim.    | 6 tim.                   | 7 tim.                   | 8 tim.                   | 9 tim.                   | 10 tim.                  | 11 tim.                  | 12 tim.                  | 13 eller<br>fler tim.    |
| <input type="checkbox"/> | <input type="checkbox"/> | <input type="checkbox"/> | <input type="checkbox"/> | <input type="checkbox"/> | <input type="checkbox"/> | <input type="checkbox"/> | <input type="checkbox"/> | <input type="checkbox"/> |

32. Hur många timmar/vecka ägnade du dig åt någon fysisk aktivitet den senaste månaden? (Avrunda till hela antal timmar.)

|                          |                          |                          |                          |                          |                          |                          |                          |                          |
|--------------------------|--------------------------|--------------------------|--------------------------|--------------------------|--------------------------|--------------------------|--------------------------|--------------------------|
| 0 tim/v                  | 1 tim/v                  | 2 tim/v                  | 3 tim/v                  | 4 tim/v                  | 5 tim/v                  | 6 - 10<br>tim/v          | 11 - 20<br>tim/v         | 21 eller fler<br>tim/v   |
| <input type="checkbox"/> | <input type="checkbox"/> | <input type="checkbox"/> | <input type="checkbox"/> | <input type="checkbox"/> | <input type="checkbox"/> | <input type="checkbox"/> | <input type="checkbox"/> | <input type="checkbox"/> |

33. Hur många gånger i veckan har du i genomsnitt vaginalt samlag? (Ange i hela antal gånger)

|                          |                          |                          |                          |                          |                          |                          |                          |                          |
|--------------------------|--------------------------|--------------------------|--------------------------|--------------------------|--------------------------|--------------------------|--------------------------|--------------------------|
| Färre än 1<br>gång/v.    | 1 gång/v.                | 2 ggr/v.                 | 3 ggr/v.                 | 4 ggr/v.                 | 5 ggr/v.                 | 6 ggr/v.                 | 7 ggr/v.                 | 8 eller fler<br>ggr/v.   |
| <input type="checkbox"/> | <input type="checkbox"/> | <input type="checkbox"/> | <input type="checkbox"/> | <input type="checkbox"/> | <input type="checkbox"/> | <input type="checkbox"/> | <input type="checkbox"/> | <input type="checkbox"/> |

34. Hur nöjd eller missnöjd är du med ditt sexliv?

|                          |                          |                               |                          |                          |
|--------------------------|--------------------------|-------------------------------|--------------------------|--------------------------|
| Mycket missnöjd          | Ganska missnöjd          | Varken nöjd eller<br>missnöjd | Ganska nöjd              | Mycket nöjd              |
| <input type="checkbox"/> | <input type="checkbox"/> | <input type="checkbox"/>      | <input type="checkbox"/> | <input type="checkbox"/> |

## NÅGRA FRÅGOR OM DIN HÄLSA

35. När var din senaste mens första dag? (Om du inte minns exakt dag, ange bara år och månad)

År 20..... Månad: ..... Dag: .....

36. Hur stark menstruationssmärta hade du vid din senaste mens?

Mycket stark  
smärta

Ganska stark  
smärta

Varken stark eller  
svag smärta

Ganska svag  
smärta

Mycket svag  
smärta

37. Hur gammal var du när du fick din första menstruation? ..... år gammal

38. Hur lång är vanligtvis din **menstruationscykel**? (Med **menstruationscykel** menas tiden mellan första dagen i en menstruation och första dagen i nästa menstruation)

20 dagar  
eller färre

21 – 25  
dagar

26  
dagar

27  
dagar

28  
dagar

29  
dagar

30  
dagar

31 – 35  
dagar

36 dagar  
eller fler

39. Har du eller har du tidigare haft någon av följande diagnoser/sjukdomar?

(Kryssa för alla alternativ som stämmer)

ADHD

Hjärtsjukdom

Allergi/intolerans mot någon mat

Hypertoni/högt blodtryck

Astma

Klamydia

Bipolär sjukdom

Ledvärk

Depression

Njursjukdom

Diabetes

PCOS (*polycystiskt ovariesyndrom*)

Endometrios

Ryggvärk

Epilepsi

Ängest

Gynekologisk cellförändring

Ätstörning (*t.ex. bulimi eller anorexi*)

Sköldkörtelsjukdom (*t.ex. hypotyreos eller hypertyreos*)

40. Har du haft någon annan sjukdom/diagnos än de som frågades efter i föregående fråga?

Nej

Ja, jag har haft följande sjukdom(ar)/diagnos(er): .....

.....

41. Har du någon gång genomgått en bukoperation?  Ja  Nej

42. Hur bedömer du att ditt allmänna hälsotillstånd är **för närvarande**?

|                          |                          |                          |                          |                          |
|--------------------------|--------------------------|--------------------------|--------------------------|--------------------------|
| Mycket bra               | Ganska bra               | Varken bra eller dåligt  | Ganska dåligt            | Mycket dåligt            |
| <input type="checkbox"/> | <input type="checkbox"/> | <input type="checkbox"/> | <input type="checkbox"/> | <input type="checkbox"/> |

---

## EVENTUELLA TIDIGARE GRAVIDITETER

---

43. a. Har du varit gravid tidigare (räkna även in missfall och aborter)?

Ja       Nej → *Fortsätt till fråga 44*

b. Hur många gånger har du varit gravid (räkna även in missfall och aborter)?

|                          |                          |                          |                          |                          |                          |                          |                          |                          |
|--------------------------|--------------------------|--------------------------|--------------------------|--------------------------|--------------------------|--------------------------|--------------------------|--------------------------|
| 1 gång                   | 2 ggr                    | 3 ggr                    | 4 ggr                    | 5 ggr                    | 6 ggr                    | 7 ggr                    | 8 ggr                    | 9 eller fler ggr         |
| <input type="checkbox"/> | <input type="checkbox"/> | <input type="checkbox"/> | <input type="checkbox"/> | <input type="checkbox"/> | <input type="checkbox"/> | <input type="checkbox"/> | <input type="checkbox"/> | <input type="checkbox"/> |

c. Hur gammal var du när du blev gravid för första gången (räkna även in missfall och aborter)?

..... år

d. Hur många gånger har du råkat ut för missfall i månad 0-6?

0 ggr     1 gång     2 ggr     3 ggr     4 ggr     5 ggr     6 eller fler ggr

e. Hur många gånger har du genomgått abort?

0 ggr     1 gång     2 ggr     3 ggr     4 ggr     5 ggr     6 eller fler ggr

f. Hur många gånger har du haft utomkvedshavandeskap?

0 ggr     1 gång     2 ggr     3 ggr     4 ggr     5 ggr     6 eller fler ggr

44. a. Har du fött barn tidigare?     Ja       Nej → *Fortsätt till fråga 45*

|                                                  |                          |                          |                          |                          |                          |                          |
|--------------------------------------------------|--------------------------|--------------------------|--------------------------|--------------------------|--------------------------|--------------------------|
|                                                  | 0                        | 1                        | 2                        | 3                        | 4                        | 5 eller fler             |
| b. Om ja, hur många?                             | <input type="checkbox"/> | <input type="checkbox"/> | <input type="checkbox"/> | <input type="checkbox"/> | <input type="checkbox"/> | <input type="checkbox"/> |
| c. Hur många föddes levande?                     | <input type="checkbox"/> | <input type="checkbox"/> | <input type="checkbox"/> | <input type="checkbox"/> | <input type="checkbox"/> | <input type="checkbox"/> |
| d. Hur många föddes mer än 3 månader för tidigt? | <input type="checkbox"/> | <input type="checkbox"/> | <input type="checkbox"/> | <input type="checkbox"/> | <input type="checkbox"/> | <input type="checkbox"/> |
| e. Hur många hade en medfödd missbildning?       | <input type="checkbox"/> | <input type="checkbox"/> | <input type="checkbox"/> | <input type="checkbox"/> | <input type="checkbox"/> | <input type="checkbox"/> |
| f. Hur många biologiska barn har du idag?        | <input type="checkbox"/> | <input type="checkbox"/> | <input type="checkbox"/> | <input type="checkbox"/> | <input type="checkbox"/> | <input type="checkbox"/> |

---

## OMSTÄNDIGHETER KRING DITT NUVARANDE GRAVIDITETSFÖRSÖK

---

Här nedan följer några frågor som berör omständigheterna kring ditt/ert nuvarande graviditetsförsök. Med detta avses tiden från att ni inledde ett aktivt försök att bli gravida fram till och med dagens datum.

45. Sedan när har du och din nuvarande partner aktivt försökt att bli gravida?

År: ..... Månad: .....

46. Vem tog **initiativet** till beslutet att du skulle försöka bli gravid?

Bara jag  Mest jag

Jag och min partner lika mycket

Bara min partner  Mest min partner

Annan/andra, beskriv: .....

47. Satte du/ni upp en **tidsram** inom vilken du/ni förväntade att du skulle bli gravid?

Ja, jag/vi förväntade att jag skulle bli gravid inom ..... veckor / .....månad(er)

Nej

48. Har du använt dig av ägglossningstest under tiden som ditt nuvarande graviditetsförsök har pågått?

Nej  Ja, jag har använt ..... st ägglossningstest

49. Har du under ditt nuvarande graviditetsförsök övervägt att adoptera ett barn?

Ja, mycket

Ja, lite

Varken ja eller nej

Nej, inte direkt

Nej, inte alls

50. Har du fått personlig rådgivning om infertilitet eller ditt nuvarande graviditetsförsök av någon av följande yrkeskategorier? (Kryssa för allt som stämmer)

Husläkare

Specialistläkare

Barnmorska

Sjuksköterska

Dietist

Kurator

Annan: .....

Nej, har inte fått personlig rådgivning omkring infertilitet eller mitt nuvarande graviditetsförsök



51. Har du, under tiden från att du inledde ditt nuvarande graviditetsförsök, gjort något för att förbättra din hälsa som förberedelse för graviditet? (Kryssa för allt som stämmer)

Tagit folsyra

Slutat röka

Dragit ner på rökningen

Slutat snusa

Dragit ner på snusningen

Slutat dricka alkohol

Dragit ner på alkoholintaget

Slutat dricka kaffe

Dragit ner på kaffeintaget

Motionerat mer

Motionerat mindre

Ändrat din medicinering

Ätit mer hälsosamt, beskriv: .....

Sökt medicinsk rådgivning/hälsorådgivning

Vidtagit andra åtgärder, beskriv: .....

**eller**

Jag har inte gjort något av ovanstående

52. Var har du och/eller din partner sökt information om infertilitet eller ditt nuvarande graviditetsförsök? (Kryssa för allt som stämmer)

Mödravårdscentral / Barnmorskemottagning

Annan hälso- och sjukvårdsinstans

Familj, vänner och bekanta

Livsmedelsverket

Statens Folkhälsoinstitut

Internetforum (*internetsidor: gravid, familjeliv, growingpeople, alltförföräldrar*)

Vårdsidor på internet (*t.ex. 1177, vårdguiden*)

Andra internetkällor:.....

Tidningar

Böcker

Annat: .....

Har inte sökt information om infertilitet eller mitt nuvarande graviditetsförsök

## NÅGRA FRÅGOR OM DIG SJÄLV OCH HUR DU HAR DET

|                                                                                                       |                                                         |                                                         |                                               |                                                  |                                       |
|-------------------------------------------------------------------------------------------------------|---------------------------------------------------------|---------------------------------------------------------|-----------------------------------------------|--------------------------------------------------|---------------------------------------|
| 53. Markera med ett kryss det svar som bäst motsvarar hur du har känt det <b>den senaste veckan</b> . |                                                         |                                                         |                                               |                                                  |                                       |
| a.                                                                                                    | Jag känner mig spänd och nervös                         | Väldigt ofta<br><input type="checkbox"/>                | Ofta<br><input type="checkbox"/>              | Sällan<br><input type="checkbox"/>               | Inte alls<br><input type="checkbox"/> |
| b.                                                                                                    | Jag har en känsla av att något hemskt kommer att hända  | Mycket klart och obehagligt<br><input type="checkbox"/> | Inte så starkt nu<br><input type="checkbox"/> | Betydligt svagare nu<br><input type="checkbox"/> | Inte alls<br><input type="checkbox"/> |
| c.                                                                                                    | Jag bekymrar mig över saker                             | Väldigt ofta<br><input type="checkbox"/>                | Ofta<br><input type="checkbox"/>              | Sällan<br><input type="checkbox"/>               | Inte alls<br><input type="checkbox"/> |
| d.                                                                                                    | Jag kan sitta stilla och känna mig avslappnad           | Väldigt ofta<br><input type="checkbox"/>                | Ofta<br><input type="checkbox"/>              | Sällan<br><input type="checkbox"/>               | Inte alls<br><input type="checkbox"/> |
| e.                                                                                                    | Jag känner mig orolig, som om jag hade fjärilar i magen | Väldigt ofta<br><input type="checkbox"/>                | Ofta<br><input type="checkbox"/>              | Sällan<br><input type="checkbox"/>               | Inte alls<br><input type="checkbox"/> |
| f.                                                                                                    | Jag känner mig rastlös                                  | Väldigt ofta<br><input type="checkbox"/>                | Ofta<br><input type="checkbox"/>              | Sällan<br><input type="checkbox"/>               | Inte alls<br><input type="checkbox"/> |
| g.                                                                                                    | Jag får plötsliga panikkänslor                          | Väldigt ofta<br><input type="checkbox"/>                | Ofta<br><input type="checkbox"/>              | Sällan<br><input type="checkbox"/>               | Inte alls<br><input type="checkbox"/> |

54. För följande 10 frågor, kryssa för det alternativ som bäst beskriver hur du har känt det **den senaste veckan**.

|                                                                                                                                                                                                                                                                                            |                                                                                                                                                                                                                                                                                                                                                                                                                                                    |
|--------------------------------------------------------------------------------------------------------------------------------------------------------------------------------------------------------------------------------------------------------------------------------------------|----------------------------------------------------------------------------------------------------------------------------------------------------------------------------------------------------------------------------------------------------------------------------------------------------------------------------------------------------------------------------------------------------------------------------------------------------|
| <p>a. Jag har kunnat skratta och se tillvaron från den ljusa sidan</p> <p><input type="checkbox"/> Lika bra som vanligt</p> <p><input type="checkbox"/> Nästan lika bra som vanligt</p> <p><input type="checkbox"/> Mycket mindre än vanligt</p> <p><input type="checkbox"/> Inte alls</p> | <p>f. Det har kört ihop sig för mig och blivit för mycket</p> <p><input type="checkbox"/> Ja, mesta tiden har jag inte kunnat ta itu med något alls</p> <p><input type="checkbox"/> Ja, ibland har jag inte kunnat ta itu med saker lika bra som vanligt</p> <p><input type="checkbox"/> Nej, för det mesta har jag kunnat ta itu med saker ganska bra</p> <p><input type="checkbox"/> Nej, jag har kunnat ta itu med saker precis som vanligt</p> |
| <p>b. Jag har glatt mig åt saker som skall hända</p> <p><input type="checkbox"/> Lika mycket som vanligt</p> <p><input type="checkbox"/> Något mindre än vanligt</p> <p><input type="checkbox"/> Mycket mindre än vanligt</p> <p><input type="checkbox"/> Inte alls</p>                    | <p>g. Jag har känt mig så olycklig att jag har haft svårt att sova</p> <p><input type="checkbox"/> Ja, för det mesta</p> <p><input type="checkbox"/> Ja, ibland</p> <p><input type="checkbox"/> Nej, sällan</p> <p><input type="checkbox"/> Nej, aldrig</p>                                                                                                                                                                                        |
| <p>c. Jag har lagt skulden på mig själv onödigt mycket när något gått snett</p> <p><input type="checkbox"/> Ja, för det mesta</p> <p><input type="checkbox"/> Ja, ibland</p> <p><input type="checkbox"/> Inte så ofta</p> <p><input type="checkbox"/> Nej, aldrig</p>                      | <p>h. Jag har känt mig ledsen och nere</p> <p><input type="checkbox"/> Ja, för det mesta</p> <p><input type="checkbox"/> Ja, rätt ofta</p> <p><input type="checkbox"/> Nej, sällan</p> <p><input type="checkbox"/> Nej, aldrig</p>                                                                                                                                                                                                                 |
| <p>d. Jag har känt mig rädd och orolig utan egentlig anledning</p> <p><input type="checkbox"/> Nej, inte alls</p> <p><input type="checkbox"/> Ganska sällan</p> <p><input type="checkbox"/> Ja, ibland</p> <p><input type="checkbox"/> Ja, mycket ofta</p>                                 | <p>i. Jag har känt mig så olycklig att jag gråtit</p> <p><input type="checkbox"/> Ja, nästan jämt</p> <p><input type="checkbox"/> Ja, ganska ofta</p> <p><input type="checkbox"/> Bara någon gång</p> <p><input type="checkbox"/> Aldrig</p>                                                                                                                                                                                                       |
| <p>e. Jag har känt mig skrämmd eller panikslagen utan speciell anledning</p> <p><input type="checkbox"/> Ja, mycket ofta</p> <p><input type="checkbox"/> Ja, ibland</p> <p><input type="checkbox"/> Nej, ganska sällan</p> <p><input type="checkbox"/> Nej, inte alls</p>                  | <p>j. Tankar på att göra mig själv illa har förekommit</p> <p><input type="checkbox"/> Ja, rätt ofta</p> <p><input type="checkbox"/> Ja, då och då</p> <p><input type="checkbox"/> Ganska sällan</p> <p><input type="checkbox"/> Aldrig</p>                                                                                                                                                                                                        |

| 55. Hur ofta har Du under <b>den senaste månaden</b> ...                     |                          |                          |                          |                          |                          |
|------------------------------------------------------------------------------|--------------------------|--------------------------|--------------------------|--------------------------|--------------------------|
|                                                                              | Aldrig                   | Sällan                   | Ibland                   | Ganska ofta              | Mycket ofta              |
| a. ... blivit upprörd över något som skett helt oväntat?                     | <input type="checkbox"/> | <input type="checkbox"/> | <input type="checkbox"/> | <input type="checkbox"/> | <input type="checkbox"/> |
| b. ... känt att Du inte haft kontroll över de viktiga faktorerna i ditt liv? | <input type="checkbox"/> | <input type="checkbox"/> | <input type="checkbox"/> | <input type="checkbox"/> | <input type="checkbox"/> |
| c. ... känt Dig nervös och stressad?                                         | <input type="checkbox"/> | <input type="checkbox"/> | <input type="checkbox"/> | <input type="checkbox"/> | <input type="checkbox"/> |
| d. ... känt Dig säker på Din förmåga att hantera personliga problem?         | <input type="checkbox"/> | <input type="checkbox"/> | <input type="checkbox"/> | <input type="checkbox"/> | <input type="checkbox"/> |
| e. ... tyckt att saker och ting har utvecklats som Du velat?                 | <input type="checkbox"/> | <input type="checkbox"/> | <input type="checkbox"/> | <input type="checkbox"/> | <input type="checkbox"/> |
| f. ... känt att Du inte kunde hantera allt som måste göras?                  | <input type="checkbox"/> | <input type="checkbox"/> | <input type="checkbox"/> | <input type="checkbox"/> | <input type="checkbox"/> |
| g. ... känt att Du har haft kontroll över irriterande moment i Ditt liv?     | <input type="checkbox"/> | <input type="checkbox"/> | <input type="checkbox"/> | <input type="checkbox"/> | <input type="checkbox"/> |
| h. ... känt att Du har haft kontroll över saker och ting?                    | <input type="checkbox"/> | <input type="checkbox"/> | <input type="checkbox"/> | <input type="checkbox"/> | <input type="checkbox"/> |
| i. ... blivit arg över saker som har hänt och som låg utanför Din kontroll?  | <input type="checkbox"/> | <input type="checkbox"/> | <input type="checkbox"/> | <input type="checkbox"/> | <input type="checkbox"/> |
| j. ... känt att problemen blivit så många att Du inte kunnat bemästra dem?   | <input type="checkbox"/> | <input type="checkbox"/> | <input type="checkbox"/> | <input type="checkbox"/> | <input type="checkbox"/> |

## GRAVIDITET I ALLMÄNHET

**Här följer några frågor om vad du tror om förmågan att bli gravid. OBS! Detta är inte ett kunskapstest – vi vill bara veta vad du tror.**

56. Hur stor tror du chansen i genomsnitt är att en kvinna i din ålder blir gravid, om hon har oskyddat vaginalt samlag **precis vid ägglossningen**?

..... procents chans per ägglossningstillfälle

57. Hur stor tror du chansen i genomsnitt är, per försök, att en kvinna i din ålder blir gravid **med hjälp av provrörsbefruktning**?

..... procents chans per försök

58. Vid vilken ålder tror du att kvinnor är som mest fruktsamma? ..... år

59. Vid vilken ålder tror du att en **viss** nedgång i en kvinnas förmåga att bli gravid börjar? ..... år

60. Vid vilken ålder tror du att en **påtaglig** nedgång i en kvinnas förmåga att bli gravid börjar? ..... år

61. Har du upplevt följande aspekter som stödjande eller som hindrande för att få/ha barn?

|                                         | Mycket stödjande         | Ganska stödjande         | Varken stödjande eller hindrande | Ganska hindrande         | Mycket hindrande         | Ej aktuellt              |
|-----------------------------------------|--------------------------|--------------------------|----------------------------------|--------------------------|--------------------------|--------------------------|
| Din partner                             | <input type="checkbox"/> | <input type="checkbox"/> | <input type="checkbox"/>         | <input type="checkbox"/> | <input type="checkbox"/> | <input type="checkbox"/> |
| Din familj                              | <input type="checkbox"/> | <input type="checkbox"/> | <input type="checkbox"/>         | <input type="checkbox"/> | <input type="checkbox"/> | <input type="checkbox"/> |
| Dina vänner                             | <input type="checkbox"/> | <input type="checkbox"/> | <input type="checkbox"/>         | <input type="checkbox"/> | <input type="checkbox"/> | <input type="checkbox"/> |
| Din ålder                               | <input type="checkbox"/> | <input type="checkbox"/> | <input type="checkbox"/>         | <input type="checkbox"/> | <input type="checkbox"/> | <input type="checkbox"/> |
| Din mognad                              | <input type="checkbox"/> | <input type="checkbox"/> | <input type="checkbox"/>         | <input type="checkbox"/> | <input type="checkbox"/> | <input type="checkbox"/> |
| Din boende situation                    | <input type="checkbox"/> | <input type="checkbox"/> | <input type="checkbox"/>         | <input type="checkbox"/> | <input type="checkbox"/> | <input type="checkbox"/> |
| Din karriär                             | <input type="checkbox"/> | <input type="checkbox"/> | <input type="checkbox"/>         | <input type="checkbox"/> | <input type="checkbox"/> | <input type="checkbox"/> |
| Dina anställningsförhållanden           | <input type="checkbox"/> | <input type="checkbox"/> | <input type="checkbox"/>         | <input type="checkbox"/> | <input type="checkbox"/> | <input type="checkbox"/> |
| Din ekonomi                             | <input type="checkbox"/> | <input type="checkbox"/> | <input type="checkbox"/>         | <input type="checkbox"/> | <input type="checkbox"/> | <input type="checkbox"/> |
| Vilken föräldrapenning du har rätt till | <input type="checkbox"/> | <input type="checkbox"/> | <input type="checkbox"/>         | <input type="checkbox"/> | <input type="checkbox"/> | <input type="checkbox"/> |

## NÅGRA FRÅGOR OM DIN UPPVÄXT

Här följer några frågor om din uppväxt. Om frågorna väcker ett behov av att få prata med någon utomstående kan du vända dig till din läkare som hänvisar dig till den hjälp du behöver.

|     |                                                                                          |                          |                          |
|-----|------------------------------------------------------------------------------------------|--------------------------|--------------------------|
| 62. | Under dina <u>första 18 levnadsår</u> :                                                  |                          |                          |
|     |                                                                                          | Ja                       | Nej                      |
| a.  | Levde du tillsammans med någon som hade problematiska alkoholvanor eller var alkoholist? | <input type="checkbox"/> | <input type="checkbox"/> |
| b.  | Levde du tillsammans med någon som använde droger?                                       | <input type="checkbox"/> | <input type="checkbox"/> |
| c.  | Var dina föräldrar någonsin separerade eller skilda?                                     | <input type="checkbox"/> | <input type="checkbox"/> |
| d.  | Var någon i ditt hem deprimerad eller psykiskt sjuk?                                     | <input type="checkbox"/> | <input type="checkbox"/> |
| e.  | Försökte någon i ditt hem begå självmord?                                                | <input type="checkbox"/> | <input type="checkbox"/> |
| f.  | Var någon i ditt hem någonsin satt i fängelse?                                           | <input type="checkbox"/> | <input type="checkbox"/> |

|     |                                                                                                                                       |                          |                          |                          |                          |                          |
|-----|---------------------------------------------------------------------------------------------------------------------------------------|--------------------------|--------------------------|--------------------------|--------------------------|--------------------------|
| 63. | Under dina första 18 levnadsår:                                                                                                       |                          |                          |                          |                          |                          |
|     |                                                                                                                                       | Aldrig                   | En, två gånger           | Ibland                   | Ofta                     | Mycket ofta              |
| a.  | Hur ofta kände du att ingen i din familj älskade dig eller tyckte att du var viktig eller speciell?                                   | <input type="checkbox"/> | <input type="checkbox"/> | <input type="checkbox"/> | <input type="checkbox"/> | <input type="checkbox"/> |
| b.  | Hur ofta kände du att i din familj brydde man sig inte om varandra, stod inte varandra känslomässigt nära och stöttade inte varandra? | <input type="checkbox"/> | <input type="checkbox"/> | <input type="checkbox"/> | <input type="checkbox"/> | <input type="checkbox"/> |
| c.  | Hur ofta hade du inte tillräckligt att äta, var tvungen att ha smutsiga kläder på dig och upplevde att ingen tog hand om dig?         | <input type="checkbox"/> | <input type="checkbox"/> | <input type="checkbox"/> | <input type="checkbox"/> | <input type="checkbox"/> |
| d.  | Hur ofta var dina föräldrar för berusade eller drogade för att ta hand om dig eller ta dig till läkare om du behövde det?             | <input type="checkbox"/> | <input type="checkbox"/> | <input type="checkbox"/> | <input type="checkbox"/> | <input type="checkbox"/> |

|     |                                                                                                                                                                                                                               |                          |                          |                          |                          |                          |
|-----|-------------------------------------------------------------------------------------------------------------------------------------------------------------------------------------------------------------------------------|--------------------------|--------------------------|--------------------------|--------------------------|--------------------------|
| 64. | Ibland förekommer det att föräldrar eller andra vuxna skadar barn. Under din uppväxt, det vill säga under <u>dina första 18 levnadsår</u> , hur ofta förekom det att en förälder, styvförälder eller vuxen boende i ditt hem: |                          |                          |                          |                          |                          |
|     |                                                                                                                                                                                                                               | Aldrig                   | En, två gånger           | Ibland                   | Ofta                     | Mycket ofta              |
| a.  | Svor åt dig, förolämpade dig eller kränkte dig?                                                                                                                                                                               | <input type="checkbox"/> | <input type="checkbox"/> | <input type="checkbox"/> | <input type="checkbox"/> | <input type="checkbox"/> |
| b.  | Hotade att slå dig eller kasta något på dig, men gjorde det inte?                                                                                                                                                             | <input type="checkbox"/> | <input type="checkbox"/> | <input type="checkbox"/> | <input type="checkbox"/> | <input type="checkbox"/> |
| c.  | Agerade på ett sätt som gjorde dig rädd att du kanske skulle bli fysiskt skadad?                                                                                                                                              | <input type="checkbox"/> | <input type="checkbox"/> | <input type="checkbox"/> | <input type="checkbox"/> | <input type="checkbox"/> |
| d.  | Faktiskt knuffade, grep tag, föste, slog eller kastade något på dig?                                                                                                                                                          | <input type="checkbox"/> | <input type="checkbox"/> | <input type="checkbox"/> | <input type="checkbox"/> | <input type="checkbox"/> |
| e.  | Slog dig så hårt att du fick märken eller blev skadad?                                                                                                                                                                        | <input type="checkbox"/> | <input type="checkbox"/> | <input type="checkbox"/> | <input type="checkbox"/> | <input type="checkbox"/> |

|     |                                                                                                                                                                                                                                         |                          |                          |                          |                          |                          |
|-----|-----------------------------------------------------------------------------------------------------------------------------------------------------------------------------------------------------------------------------------------|--------------------------|--------------------------|--------------------------|--------------------------|--------------------------|
| 65. | Ibland förekommer fysiskt våld mellan föräldrar. Under <u>dina första 18 levnadsår</u> hur ofta gjorde din pappa (eller styvpappa) eller din mammas pojkvän/partner någon/några av dessa <b>saker mot din mamma (eller styvmamma)</b> ? |                          |                          |                          |                          |                          |
|     |                                                                                                                                                                                                                                         | Aldrig                   | En, två gånger           | Ibland                   | Ofta                     | Mycket ofta              |
| a.  | Knuffade, grep tag, slog eller kastade något på henne?                                                                                                                                                                                  | <input type="checkbox"/> | <input type="checkbox"/> | <input type="checkbox"/> | <input type="checkbox"/> | <input type="checkbox"/> |
| b.  | Sparkade, bet eller slog henne med knuten näve eller med något hårt?                                                                                                                                                                    | <input type="checkbox"/> | <input type="checkbox"/> | <input type="checkbox"/> | <input type="checkbox"/> | <input type="checkbox"/> |
| c.  | Slog henne upprepat under åtminstone några minuter?                                                                                                                                                                                     | <input type="checkbox"/> | <input type="checkbox"/> | <input type="checkbox"/> | <input type="checkbox"/> | <input type="checkbox"/> |
| d.  | Hotade henne med kniv eller skjutvapen, eller använde kniv eller skjutvapen för att skada henne?                                                                                                                                        | <input type="checkbox"/> | <input type="checkbox"/> | <input type="checkbox"/> | <input type="checkbox"/> | <input type="checkbox"/> |

|     |                                                                                                                                                                                                                                          |                          |                          |                          |                          |                          |
|-----|------------------------------------------------------------------------------------------------------------------------------------------------------------------------------------------------------------------------------------------|--------------------------|--------------------------|--------------------------|--------------------------|--------------------------|
| 66. | Ibland förekommer fysiskt våld mellan föräldrar. Under <u>dina första 18 levnadsår</u> hur ofta gjorde din mamma (eller styvmamma) eller din pappas flickvän/partner någon/några av dessa <b>saker mot din pappa (eller styvpappa)</b> ? |                          |                          |                          |                          |                          |
|     |                                                                                                                                                                                                                                          | Aldrig                   | En, två gånger           | Ibland                   | Ofta                     | Mycket ofta              |
| a.  | Knuffade, grep tag, slog eller kastade något på honom?                                                                                                                                                                                   | <input type="checkbox"/> | <input type="checkbox"/> | <input type="checkbox"/> | <input type="checkbox"/> | <input type="checkbox"/> |
| b.  | Sparkade, bet eller slog honom med knuten näve eller med något hårt?                                                                                                                                                                     | <input type="checkbox"/> | <input type="checkbox"/> | <input type="checkbox"/> | <input type="checkbox"/> | <input type="checkbox"/> |
| c.  | Slog honom upprepat under åtminstone några minuter?                                                                                                                                                                                      | <input type="checkbox"/> | <input type="checkbox"/> | <input type="checkbox"/> | <input type="checkbox"/> | <input type="checkbox"/> |
| d.  | Hotade honom med kniv eller skjutvapen, eller använde kniv eller skjutvapen för att skada honom?                                                                                                                                         | <input type="checkbox"/> | <input type="checkbox"/> | <input type="checkbox"/> | <input type="checkbox"/> | <input type="checkbox"/> |

67. En del människor har under de första 18 levnadsåren av sin uppväxt sexuella upplevelser med en vuxen eller någon minst 5 år äldre än de själva. Dessa upplevelser kan ha involverat en släkting, vän till familjen eller främling. Under dina första 18 levnadsår har en vuxen eller äldre släkting, vän till familjen eller främling någon gång:

|                                                                                                                                                                     | Första gången detta inträffade, hur gammal var du? | Första gången, detta inträffade, skedde det mot din vilja?  | Sista gången detta inträffade, hur gammal var du? | Ungefär hur många gånger hände detta dig? | Hur många människor gjorde detta med dig? | Vilket kön hade den/de som gjorde detta?                                                          |
|---------------------------------------------------------------------------------------------------------------------------------------------------------------------|----------------------------------------------------|-------------------------------------------------------------|---------------------------------------------------|-------------------------------------------|-------------------------------------------|---------------------------------------------------------------------------------------------------|
| a. Berört eller smekt din kropp på ett sexuellt sätt?<br><br><input type="checkbox"/> Ja <input type="checkbox"/> Nej<br>Om "Ja" →                                  | -----<br>år                                        | <input type="checkbox"/> Ja<br><input type="checkbox"/> Nej | -----<br>år                                       | -----<br>gånger                           | -----<br>människor                        | <input type="checkbox"/> man<br><input type="checkbox"/> kvinna<br><input type="checkbox"/> bägge |
| b. Fick dig att beröra eller smeka sin kropp på ett sexuellt sätt?<br><br><input type="checkbox"/> Ja <input type="checkbox"/> Nej<br>Om "Ja" →                     | -----<br>år                                        | <input type="checkbox"/> Ja<br><input type="checkbox"/> Nej | -----<br>år                                       | -----<br>gånger                           | -----<br>människor                        | <input type="checkbox"/> man<br><input type="checkbox"/> kvinna<br><input type="checkbox"/> bägge |
| c. Försökt att ha någon typ av sexuellt umgänge (oralt, analt eller vaginalt) med dig?<br><br><input type="checkbox"/> Ja <input type="checkbox"/> Nej<br>Om "Ja" → | -----<br>år                                        | <input type="checkbox"/> Ja<br><input type="checkbox"/> Nej | -----<br>år                                       | -----<br>gånger                           | -----<br>människor                        | <input type="checkbox"/> man<br><input type="checkbox"/> kvinna<br><input type="checkbox"/> bägge |
| d. Faktiskt genomfört sexuellt umgänge (oralt, analt eller vaginalt) med dig?<br><br><input type="checkbox"/> Ja <input type="checkbox"/> Nej<br>Om "Ja" →          | -----<br>år                                        | <input type="checkbox"/> Ja<br><input type="checkbox"/> Nej | -----<br>år                                       | -----<br>gånger                           | -----<br>människor                        | <input type="checkbox"/> man<br><input type="checkbox"/> kvinna<br><input type="checkbox"/> bägge |

68. Tyckte du att frågorna om din uppväxt (fråga 62-67) var obehagliga att svara på?

- Ja, jag vill inte svara  
 Ja, men det känns okej att svara  
 Nej, det är okej att svara  
 Vet ej/Ingen åsikt



## OM DITT BESÖK PÅ VÅR MOTTAGNING

---

69. Vad har du för förväntningar på ditt besök på vår mottagning?

- Få veta anledningen till att jag inte blivit gravid, och få behandling så fort som möjligt
- Få veta anledningen till att jag inte blivit gravid, men vill avvakta med behandlingen och fortsätta med egna försök ett tag till

Annat, beskriv: .....

.....

.....

.....

.....

.....

.....

.....

.....

.....

.....

.....

.....

.....

.....

.....

.....

.....

.....

.....

.....

.....

.....

## NÅGRA AVSLUTANDE FRÅGOR

---

70. Har din partner varit närvarande när du fyllt i denna enkät?

- Ja       Nej

71. Har du tagit hjälp av någon när du fyllt i denna enkät?

- Nej, jag har inte tagit hjälp av någon
- Ja, av min make/partner
- Ja, av en tolk
- Ja, av läkaren/sjuksköterskan
- Ja, av någon annan. Ange vem/vilka: .....

## KOMMENTARER TILL FRÅGEFORMULÄRET

---

*Om du önskar göra tillägg eller kommentarer till detta frågeformulär, t.ex. om någon fråga var oklart formulerad, om du vill göra ett tillägg till någon fråga, eller om det var någon fråga som du saknade, så kan du göra det här. Alla kommentarer tas tacksamt emot.*

---

---

---

---

---

---

---

---

---

---

---

---

---

---

---

---

---

---

---

---

---

---

---

---

---

---

---

---

---

---

## TACK FÖR DIN MEDVERKAN!

---

Om denna enkät har väckt ett behov av att få prata med någon utomstående kan du vända dig till din läkare som kan hänvisa dig till den hjälp du behöver.



Kodnummer:.....
