# Supplementary material for: Investigating the effect of lifestyle risk factors upon number of aspirated and mature oocytes in in vitro fertilization cycles: Interaction with antral follicle count
Source: PubMed Central journal article supplement (PMC6697332; doi:10.1371/journal.pone.0221015), 2019-08-16
Supplement: pone.0221015.s005.pdf [file pone.0221015.s005.pdf]

---

# LIFESTYLE AND INFERTILITY

## A STUDY ON FERTILITY

---

DEPARTMENT OF PUBLIC HEALTH AND CARING SCIENCES (IFV)

DEPARTMENT OF WOMEN'S AND CHILDREN'S HEALTH

UPPSALA UNIVERSITY

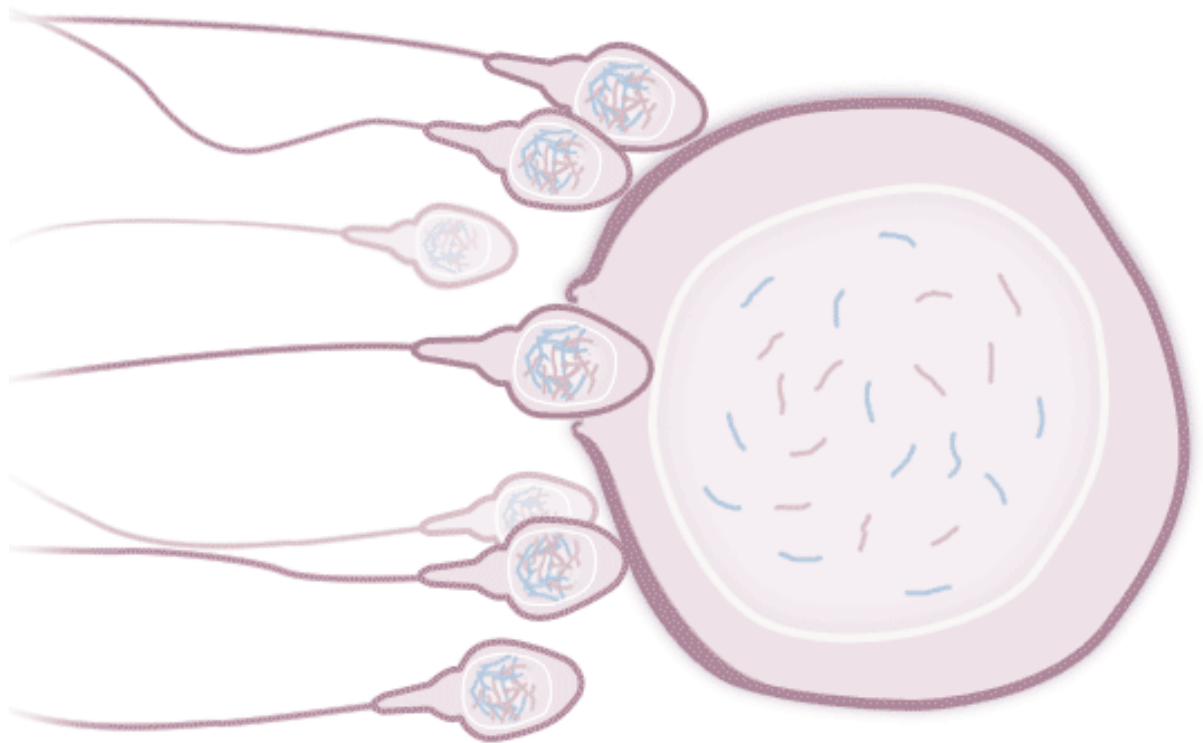



---

# YOU ARE BEING ASKED TO PARTICIPATE IN A STUDY ABOUT INFERTILITY

---

The purpose with this project is to acquire greater knowledge about which lifestyle changes have been made by infertile couples to improve their chances of becoming pregnant and the woman's attitude to sexuality, her physical health and well-being at the start of treatment and on completion of treatment either when she has become pregnant or there are no further options that can be offered. The intention of this study is to increase learn about the need for advice to sub-fertile couples with different cultural and socio-economic backgrounds. The aim is to bridge the gaps in knowledge that are apparent concerning pregnancy planning and life-style changes in relation to infertility and women's pregnancy. The results of the study may be used to develop evidence based advice concerning life-style factors for couples who attend fertility clinics, hopefully leading to improved results after treatment.

We need your contact details to be able to follow up on how you feel and the success of the treatment after approximately two years. The follow-up questions are intended to complement the first questionnaire about changes and influence on life-style during and after the period of treatment.

Your Swedish id-number will also be used to link information to the Swedish birth and pharmaceutical register. This is simply to be able to access information on the results of treatment, possible complications and pregnancy outcomes. Information may also be collected from medical journals about which treatments you have been through and their results. Your details will not be used for any other purpose than for this research project. The results will be analysed at group level and no single individual will be identifiable. Your answers will not be able to lead back to you. The authorities in charge of the study are the Department of Public Health and Caring Sciences (IFV) at Uppsala University and the County Council in Västmanland.

Your contact details will be saved with an encrypted key and will be handled in accordance with the Swedish Personal Data Act (PuL). This means that your personal details will be handled in such a way as to protect your personal integrity. All the material collected: the encrypted key, questionnaires and computer files will be handled only by the project group members and they will be kept in locked places at the Department of public health and caring sciences (IFV)

Participation in the study is voluntary. By filling in your Swedish id-number below you will be agreeing to participate in the project. Do not hesitate to ring or mail us if you have questions using our contact details below. Your consent form will be kept separate from your questionnaire. Your questionnaire will simply have an encrypted key.

Those in charge and contact people for the study are:

**Tanja Tydén** – Qualified midwife, PhD, Professor at the Department of Public Health and Caring Sciences (IFV), Uppsala University  
Tel. 018-471 66 46 • Email: [tanja.tyden@pubcare.uu.se](mailto:tanja.tyden@pubcare.uu.se)

**Kjell Wånggren** – MD., PhD associate professor, specialist in Obstetrics and Gynaecology, Department of Clinical Science, Intervention and Technology, Karolinska Institutet.  
Tel: 08-585 89 752 Email: [kjell.wanggren@karolinska.se](mailto:kjell.wanggren@karolinska.se)

**Anna Berglund** – Head Physician, MD, PhD specialist in Obstetrics and Gynaecology, National Centre for Knowledge on Men's Violence Against Women, Uppsala University.  
Tel. 018-611 00 00 • Email: [anna.berglund@kbh.uu.se](mailto:anna.berglund@kbh.uu.se)

**Lana Salih** – Physician, MD. Obstetrics and Gynaecology, Reproduction Centre, Obstetrics and Gynaecology, Uppsala University Hospital  
Tel. 018-611 00 00. • Email: [lane.salih@kbh.uu.se](mailto:lane.salih@kbh.uu.se)

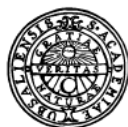

UPPSALA  
UNIVERSITET

# Consent Form

---

I consent to participating in the study of lifestyle, health and infertility. I have been informed about the study in writing and have had enough time to consider my participation. I understand that I am free to conclude my participation in this study at any time.

I consent to my personal details being dealt with as explained in the patient information and I am aware that my participation is completely voluntary.

I will receive a copy of the patient information and this consent form.

I will receive an SF cinema ticket in gratitude of my participation

|                    |                                                                                                                                                                                                                                                                                                                                                                                                                                                          |
|--------------------|----------------------------------------------------------------------------------------------------------------------------------------------------------------------------------------------------------------------------------------------------------------------------------------------------------------------------------------------------------------------------------------------------------------------------------------------------------|
| Swedish ID-number: | <input type="text"/> |
| Name:              | .....                                                                                                                                                                                                                                                                                                                                                                                                                                                    |
| Address:           | .....<br>.....                                                                                                                                                                                                                                                                                                                                                                                                                                           |
| Mobile no.....     | Tel. no.....                                                                                                                                                                                                                                                                                                                                                                                                                                             |
| Email:             | .....                                                                                                                                                                                                                                                                                                                                                                                                                                                    |

I prefer to be contacted/receive reminders by:

- Text message     Email     Post     Telephone

*NB: This page will be separated from the questionnaire and will be stored separately.*

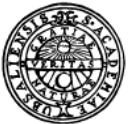

---

UPPSALA  
UNIVERSITET

## GENERAL QUESTIONS

1. Today's date:                      Year:..... Month:..... Day:.....

2. How old are you?                      ..... years old

3. What is your present occupation/s? (*Tick all relevant options*)

|                                                          | 1-24%                    | 25%                      | 26-49%                   | 50%                      | 51-74%                   | 75%                      | 76-99%                   | 100%                     |
|----------------------------------------------------------|--------------------------|--------------------------|--------------------------|--------------------------|--------------------------|--------------------------|--------------------------|--------------------------|
| <input type="checkbox"/> Permanent employment            | <input type="checkbox"/> | <input type="checkbox"/> | <input type="checkbox"/> | <input type="checkbox"/> | <input type="checkbox"/> | <input type="checkbox"/> | <input type="checkbox"/> | <input type="checkbox"/> |
| <input type="checkbox"/> Self-employed (own business)    | <input type="checkbox"/> | <input type="checkbox"/> | <input type="checkbox"/> | <input type="checkbox"/> | <input type="checkbox"/> | <input type="checkbox"/> | <input type="checkbox"/> | <input type="checkbox"/> |
| <input type="checkbox"/> Temporary employment            | <input type="checkbox"/> | <input type="checkbox"/> | <input type="checkbox"/> | <input type="checkbox"/> | <input type="checkbox"/> | <input type="checkbox"/> | <input type="checkbox"/> | <input type="checkbox"/> |
| <input type="checkbox"/> Student                         | <input type="checkbox"/> | <input type="checkbox"/> | <input type="checkbox"/> | <input type="checkbox"/> | <input type="checkbox"/> | <input type="checkbox"/> | <input type="checkbox"/> | <input type="checkbox"/> |
| <input type="checkbox"/> Maternity leave                 | <input type="checkbox"/> | <input type="checkbox"/> | <input type="checkbox"/> | <input type="checkbox"/> | <input type="checkbox"/> | <input type="checkbox"/> | <input type="checkbox"/> | <input type="checkbox"/> |
| <input type="checkbox"/> Sick leave                      | <input type="checkbox"/> | <input type="checkbox"/> | <input type="checkbox"/> | <input type="checkbox"/> | <input type="checkbox"/> | <input type="checkbox"/> | <input type="checkbox"/> | <input type="checkbox"/> |
| <input type="checkbox"/> Unemployed                      | <input type="checkbox"/> | <input type="checkbox"/> | <input type="checkbox"/> | <input type="checkbox"/> | <input type="checkbox"/> | <input type="checkbox"/> | <input type="checkbox"/> | <input type="checkbox"/> |
| <input type="checkbox"/> Housewife/housekeeper           | <input type="checkbox"/> | <input type="checkbox"/> | <input type="checkbox"/> | <input type="checkbox"/> | <input type="checkbox"/> | <input type="checkbox"/> | <input type="checkbox"/> | <input type="checkbox"/> |
| <input type="checkbox"/> Early retirement due to disease | <input type="checkbox"/> | <input type="checkbox"/> | <input type="checkbox"/> | <input type="checkbox"/> | <input type="checkbox"/> | <input type="checkbox"/> | <input type="checkbox"/> | <input type="checkbox"/> |

4. What is the **highest level** of education you have **completed**?

- I have not completed any education
- Elementary school
- Upper secondary school
- Vocational school or occupational training
- University – 2.5 years or less
- University 2.5 - 3.5 years
- University – Postgraduate studies

5. What is the monthly income in your household before tax?

*(Income is here used to mean: salary, unemployment pay, sickness or parental pay, pension, social benefits, child benefits, widow's benefits, social security benefits and other remunerations.)*

..... SEK / month

6. How tall are you?                      .....cm

7. How much do you weigh today?                      .....kg

8. How much did you weigh **a year ago**?                      .....kg

9. a. Where were you born?  Sweden  Another country:.....

b. If you were born in a country other than Sweden, how old were you when you came to Sweden? .....years  Less than 1 year old

c. Were you adopted?  Yes  No

10. In which country were your parents born?

a. My mother was born in:  Sweden  Another country: .....

Don't know

b. My father was born in:  Sweden  Another country: .....

Don't know

11. How well can you read and understand written Swedish?

|                          |                          |                          |                          |                          |
|--------------------------|--------------------------|--------------------------|--------------------------|--------------------------|
| Very well                | Quite well               | Neither well nor badly   | Quite badly              | Very badly               |
| <input type="checkbox"/> | <input type="checkbox"/> | <input type="checkbox"/> | <input type="checkbox"/> | <input type="checkbox"/> |

12. How important is religion in your life?

|                          |                          |                                   |                          |                          |
|--------------------------|--------------------------|-----------------------------------|--------------------------|--------------------------|
| Very important           | Quite important          | Neither important nor unimportant | Not very important       | Not important at all     |
| <input type="checkbox"/> | <input type="checkbox"/> | <input type="checkbox"/>          | <input type="checkbox"/> | <input type="checkbox"/> |

## SOME QUESTIONS ABOUT YOUR PRESENT PARTNER

---

13. Which sex is your partner?  Male  Female
14. When was your partner born? Year: 19 .....
15. How long have you and your partner been in a relationship? (*Tick the option that is nearest.*)
- |                          |                          |                          |                          |                          |                          |                          |                          |                          |
|--------------------------|--------------------------|--------------------------|--------------------------|--------------------------|--------------------------|--------------------------|--------------------------|--------------------------|
| Less than<br>1 year      | 1 year                   | 2 years                  | 3 years                  | 4 years                  | 5 years                  | 6 years                  | 7 years                  | 8 years<br>or more       |
| <input type="checkbox"/> | <input type="checkbox"/> | <input type="checkbox"/> | <input type="checkbox"/> | <input type="checkbox"/> | <input type="checkbox"/> | <input type="checkbox"/> | <input type="checkbox"/> | <input type="checkbox"/> |
16. What is your relationship with your present partner? (*Tick the best option*)
- |                                                                         |                                         |
|-------------------------------------------------------------------------|-----------------------------------------|
| <input type="checkbox"/> We have a relationship but don't live together | <input type="checkbox"/> We are engaged |
| <input type="checkbox"/> We live together                               | <input type="checkbox"/> We are married |
17. a. Has **your present partner** any biological children who are not your biological children?
- |                             |                                       |                                          |                                          |                                             |
|-----------------------------|---------------------------------------|------------------------------------------|------------------------------------------|---------------------------------------------|
| <input type="checkbox"/> No | <input type="checkbox"/> Yes, 1 child | <input type="checkbox"/> Yes, 2 children | <input type="checkbox"/> Yes, 3 children | <input type="checkbox"/> 4 or more children |
|-----------------------------|---------------------------------------|------------------------------------------|------------------------------------------|---------------------------------------------|
- b. Have **you** any biological children of your own, for whom your present partner is not the biological father?
- |                             |                                               |                                          |                                          |                                                     |
|-----------------------------|-----------------------------------------------|------------------------------------------|------------------------------------------|-----------------------------------------------------|
| <input type="checkbox"/> No | <input type="checkbox"/> Yes, 1 child<br>more | <input type="checkbox"/> Yes, 2 children | <input type="checkbox"/> Yes, 3 children | <input type="checkbox"/> Yes, 4 children or<br>more |
|-----------------------------|-----------------------------------------------|------------------------------------------|------------------------------------------|-----------------------------------------------------|
18. In which country was your partner born?  Sweden  Another country: .....
- Don't know
19. What is the **highest level** of education your partner has **completed**?
- |                                                                     |
|---------------------------------------------------------------------|
| <input type="checkbox"/> Has not completed any education            |
| <input type="checkbox"/> Elementary and secondary school            |
| <input type="checkbox"/> Upper secondary school                     |
| <input type="checkbox"/> Vocational school or occupational training |
| <input type="checkbox"/> University – 2.5 years or less             |
| <input type="checkbox"/> University 2.5 - 3.5 years                 |
| <input type="checkbox"/> University – Postgraduate studies          |
20. Does your present partner smoke?  No  Yes, daily  Yes, but not every day

21. For the following seven questions, tick the answer which most closely describes how you perceive your present relationship.

|                                                                                                      |                          |                          |                          |                          |                          |
|------------------------------------------------------------------------------------------------------|--------------------------|--------------------------|--------------------------|--------------------------|--------------------------|
| a. How well does your partner meet your needs in general?                                            | Not at all               |                          | Well                     |                          | Completely               |
|                                                                                                      | <input type="checkbox"/> | <input type="checkbox"/> | <input type="checkbox"/> | <input type="checkbox"/> | <input type="checkbox"/> |
| b. How content are you in general with your relationship to your partner?                            | Not at all               |                          | Well                     |                          | Completely               |
|                                                                                                      | <input type="checkbox"/> | <input type="checkbox"/> | <input type="checkbox"/> | <input type="checkbox"/> | <input type="checkbox"/> |
| c. How good is your relationship to your partner in general if you compare it to most other couples? | Much worse               |                          | Good                     |                          | Much better              |
|                                                                                                      | <input type="checkbox"/> | <input type="checkbox"/> | <input type="checkbox"/> | <input type="checkbox"/> | <input type="checkbox"/> |
| d. How often do you wish you were not together with your partner?                                    | Never                    |                          | Sometimes                |                          | Always                   |
|                                                                                                      | <input type="checkbox"/> | <input type="checkbox"/> | <input type="checkbox"/> | <input type="checkbox"/> | <input type="checkbox"/> |
| e. To what extent does your relationship with your partner live up to your original expectations?    | Not at all               |                          | Well                     |                          | Completely               |
|                                                                                                      | <input type="checkbox"/> | <input type="checkbox"/> | <input type="checkbox"/> | <input type="checkbox"/> | <input type="checkbox"/> |
| f. How much do you like your partner?                                                                | Very little              |                          | Well enough              |                          | Very much                |
|                                                                                                      | <input type="checkbox"/> | <input type="checkbox"/> | <input type="checkbox"/> | <input type="checkbox"/> | <input type="checkbox"/> |
| g. How many problems do you have in your relationship?                                               | Very few                 |                          | Moderate                 |                          | Very many                |
|                                                                                                      | <input type="checkbox"/> | <input type="checkbox"/> | <input type="checkbox"/> | <input type="checkbox"/> | <input type="checkbox"/> |

## YOUR LIFESTYLE JUST NOW

22. What type of food do you eat **just now**? (Tick the option which **best** describes your diet)
- An all-round diet (You eat most things and do not avoid any specific type of food)
  - Vegetarian food
  - Vegan food
  - I avoid certain foodstuffs because of food hypersensitivity
  - I avoid certain foodstuffs for religious reasons
  - LCHF-diet (Low carbohydrate, high fat diet)
  - GI-food (You eat food with a low GI i.e. glycemic index)
  - Other diet, describe

---



---



---



---



23. a. Do you take folic acid supplements **just now**?

Yes       No → Go to question 24

b. If you take folic acid supplements **just now**, when did you begin taking them?

|                          |                          |                          |                          |                          |                          |                          |                          |                             |
|--------------------------|--------------------------|--------------------------|--------------------------|--------------------------|--------------------------|--------------------------|--------------------------|-----------------------------|
| 0-2<br>weeks ago         | 3-4<br>weeks ago         | 1-2<br>months<br>ago     | 3-4<br>months<br>ago     | 5-6<br>months<br>ago     | 7-12<br>months<br>ago    | 1-2<br>years ago         | 3-4<br>years ago         | More than<br>4 years<br>ago |
| <input type="checkbox"/> | <input type="checkbox"/> | <input type="checkbox"/> | <input type="checkbox"/> | <input type="checkbox"/> | <input type="checkbox"/> | <input type="checkbox"/> | <input type="checkbox"/> | <input type="checkbox"/>    |

c. **How often** have you taken folic acid supplements during this period?

|                          |                          |                          |                          |                          |                          |
|--------------------------|--------------------------|--------------------------|--------------------------|--------------------------|--------------------------|
| At least 5<br>times/week | 3 - 4 times/week         | 1 - 2 times/week         | 2 - 3 times/month        | 1 time/month             | 1 - 6 times/year         |
| <input type="checkbox"/> | <input type="checkbox"/> | <input type="checkbox"/> | <input type="checkbox"/> | <input type="checkbox"/> | <input type="checkbox"/> |

24. a. Do you take multivitamin supplements for women **just now**?

Yes       No → Go to question 25

b. If you are taking multivitamin supplements for women **just now**, when did you begin to take them?  
(Answer in weeks, months, or years.)

|                          |                          |                          |                          |                          |                          |                          |                          |                             |
|--------------------------|--------------------------|--------------------------|--------------------------|--------------------------|--------------------------|--------------------------|--------------------------|-----------------------------|
| 0-2 weeks<br>ago         | 3-4 weeks<br>ago         | 1-2<br>months<br>ago     | 3-4<br>months<br>ago     | 5-6<br>months<br>ago     | 7-12<br>months<br>ago    | 1-2 years<br>ago         | 3-4 years<br>ago         | More than<br>4 years<br>ago |
| <input type="checkbox"/> | <input type="checkbox"/> | <input type="checkbox"/> | <input type="checkbox"/> | <input type="checkbox"/> | <input type="checkbox"/> | <input type="checkbox"/> | <input type="checkbox"/> | <input type="checkbox"/>    |

c. **How often** have you taken the multivitamin supplements for women during this period?

|                          |                          |                          |                          |                          |                          |
|--------------------------|--------------------------|--------------------------|--------------------------|--------------------------|--------------------------|
| At least 5<br>times/week | 3 - 4 times/week         | 1 - 2 times/week         | 2 - 3 times/month        | 1 time/month             | 1 - 6 times/year         |
| <input type="checkbox"/> | <input type="checkbox"/> | <input type="checkbox"/> | <input type="checkbox"/> | <input type="checkbox"/> | <input type="checkbox"/> |

25. Do you use any pharmaceutical products or naturopathic drugs below? (Tick all relevant options)

- |                                                                   |                                                                             |
|-------------------------------------------------------------------|-----------------------------------------------------------------------------|
| <input type="checkbox"/> Nose drops                               | <input type="checkbox"/> Medicines for allergies                            |
| <input type="checkbox"/> Medicines for colds                      | <input type="checkbox"/> Anti-smoking products (e.g. nicotine chewing gum)  |
| <input type="checkbox"/> Diuretics                                | <input type="checkbox"/> Other prescription free drugs                      |
| <input type="checkbox"/> Medicine for pain or inflammation relief | <input type="checkbox"/> Other naturopathic drugs                           |
| <input type="checkbox"/> Relaxants                                | <input type="checkbox"/> No, I only use prescription drugs                  |
| <input type="checkbox"/> Sleeping pills                           | <input type="checkbox"/> No, I use neither medicines nor naturopathic drugs |

26. How much coffee do you drink on average a day (1 cup = 1.5dl)? (Answer in number of cups a day)
- |                             |                          |                          |                          |                          |                          |                          |                          |                          |
|-----------------------------|--------------------------|--------------------------|--------------------------|--------------------------|--------------------------|--------------------------|--------------------------|--------------------------|
| Less than<br>1 cup a<br>day | 1<br>cup/d.              | 2<br>cups/d.             | 3<br>cups/d.             | 4<br>cups/d.             | 5<br>cups/d.             | 6<br>cups/d.             | 7<br>cups/d.             | 8 or more<br>cups/d.     |
| <input type="checkbox"/>    | <input type="checkbox"/> | <input type="checkbox"/> | <input type="checkbox"/> | <input type="checkbox"/> | <input type="checkbox"/> | <input type="checkbox"/> | <input type="checkbox"/> | <input type="checkbox"/> |
- or  I don't drink coffee

The following questions are about your alcohol consumption. In these questions we use the term "standard glass of alcohol". A STANDARD GLASS OF ALCOHOL is defined as follows:

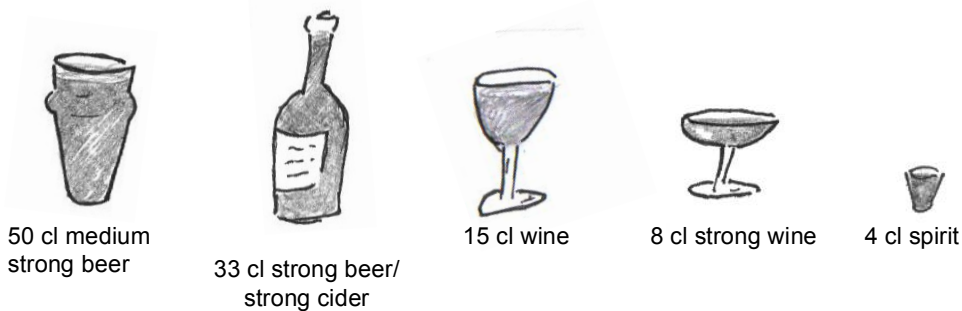

27. a. Do you drink alcohol **at present**? (Tick the option that describes your habits **best**)
- Yes, I drink every week.
- Yes, but not every week.
- No, I stopped drinking alcohol **when** I started trying to get pregnant this time
- No, I had stopped drinking alcohol **before** I started trying to get pregnant this time
- No, I have never drunk alcohol

b. How many standard glasses of alcohol a week do you drink on average **just now**?

- |                          |                          |                          |                          |                          |                          |                          |                          |                          |
|--------------------------|--------------------------|--------------------------|--------------------------|--------------------------|--------------------------|--------------------------|--------------------------|--------------------------|
| Less than<br>1 glass/w.  | 1<br>glass/w.            | 2<br>glasses/w.          | 3<br>glasses/w.          | 4<br>glasses/w.          | 5<br>glasses/w.          | 6<br>glasses/w.          | 7<br>glasses/w.          | 8 or more<br>glasses/w.  |
| <input type="checkbox"/> | <input type="checkbox"/> | <input type="checkbox"/> | <input type="checkbox"/> | <input type="checkbox"/> | <input type="checkbox"/> | <input type="checkbox"/> | <input type="checkbox"/> | <input type="checkbox"/> |

c. How many times during the last **six months** have you drunk **five standard glasses or more at one sitting**?

- |                          |                          |                          |                          |                          |                          |                          |                          |                          |
|--------------------------|--------------------------|--------------------------|--------------------------|--------------------------|--------------------------|--------------------------|--------------------------|--------------------------|
| 0 times                  | 1 time                   | 2 times.                 | 3 times.                 | 4 times.                 | 5 times.                 | 6 times.                 | 7 times.                 | 8 or more<br>times       |
| <input type="checkbox"/> | <input type="checkbox"/> | <input type="checkbox"/> | <input type="checkbox"/> | <input type="checkbox"/> | <input type="checkbox"/> | <input type="checkbox"/> | <input type="checkbox"/> | <input type="checkbox"/> |

28. a. Do you smoke **just now**? (Tick the option that **best** describes you)

- Yes, I smoke every day.
- Yes, but not every day.
- No, I have stopped smoking → Go to question 29
- No, I have never smoked → Go to question 29

b. How many cigarettes a day do you smoke on average?

| Fewer than 1 cig/day     | 1 cig/day                | 2 - 3 cig/day            | 4 - 5 cig/day            | 6 - 9 cig/day            | 10 - 14 cig/day          | 15 - 20 cig/day          | 21 - 30 cig/day          | 31 or more cig/day       |
|--------------------------|--------------------------|--------------------------|--------------------------|--------------------------|--------------------------|--------------------------|--------------------------|--------------------------|
| <input type="checkbox"/> | <input type="checkbox"/> | <input type="checkbox"/> | <input type="checkbox"/> | <input type="checkbox"/> | <input type="checkbox"/> | <input type="checkbox"/> | <input type="checkbox"/> | <input type="checkbox"/> |

29. a. Do you use Swedish snuff tobacco (Sw. 'snus') at present?

- Yes, every day
- Yes, but not every day
- No, I had stopped using it earlier → Go to question 30
- No, I have never used it → Go to question 30

b. How many portions of 'snus' a day do you use on average **just now**?

| Less than 1 port/day     | 1 port/day               | 2 - 3 port/day           | 4 - 5 port/day           | 6 - 9 port/day           | 10 - 14 port/day         | 15 - 20 port/day         | 21 - 30 port/day         | 31 or more port/day      |
|--------------------------|--------------------------|--------------------------|--------------------------|--------------------------|--------------------------|--------------------------|--------------------------|--------------------------|
| <input type="checkbox"/> | <input type="checkbox"/> | <input type="checkbox"/> | <input type="checkbox"/> | <input type="checkbox"/> | <input type="checkbox"/> | <input type="checkbox"/> | <input type="checkbox"/> | <input type="checkbox"/> |

30. Do you use nicotine substitutes (e.g. nicotine chewing gum or nicotine plasters) **just now**?

- Yes       No

31. How many hours sleep per night have you had on average on a normal weekday this **last month**?

| 5 or less hrs.           | 6 hrs.                   | 7 hrs.                   | 8 hrs.                   | 9 hrs.                   | 10 hrs.                  | 11 hrs.                  | 12 hrs.                  | 13 or more hrs.          |
|--------------------------|--------------------------|--------------------------|--------------------------|--------------------------|--------------------------|--------------------------|--------------------------|--------------------------|
| <input type="checkbox"/> | <input type="checkbox"/> | <input type="checkbox"/> | <input type="checkbox"/> | <input type="checkbox"/> | <input type="checkbox"/> | <input type="checkbox"/> | <input type="checkbox"/> | <input type="checkbox"/> |

32. How many hours a week have you spent doing any sort of physical activity this last month? (Round up or down to the nearest hour.)

| 0 hrs/w                  | 1 hr/w                   | 2 hrs/w                  | 3 hrs/w                  | 4 hrs/w                  | 5 hrs/w                  | 6 - 10 hrs/w             | 11 - 20 hrs/w            | 21 or more hrs/w         |
|--------------------------|--------------------------|--------------------------|--------------------------|--------------------------|--------------------------|--------------------------|--------------------------|--------------------------|
| <input type="checkbox"/> | <input type="checkbox"/> | <input type="checkbox"/> | <input type="checkbox"/> | <input type="checkbox"/> | <input type="checkbox"/> | <input type="checkbox"/> | <input type="checkbox"/> | <input type="checkbox"/> |

33. How many times a week on average do you have vaginal intercourse? (Round up or down)

| Fewer than 1 time/w.     | 1 time/w.                | 2 times./w.              | 3 times./w.              | 4 times./w.              | 5 times./w.              | 6 times./w.              | 7 times./w.              | 8 or more times./w.      |
|--------------------------|--------------------------|--------------------------|--------------------------|--------------------------|--------------------------|--------------------------|--------------------------|--------------------------|
| <input type="checkbox"/> | <input type="checkbox"/> | <input type="checkbox"/> | <input type="checkbox"/> | <input type="checkbox"/> | <input type="checkbox"/> | <input type="checkbox"/> | <input type="checkbox"/> | <input type="checkbox"/> |

34. How satisfied or dissatisfied are you with your sex life?

| Very dissatisfied        | Quite dissatisfied       | Neither satisfied nor dissatisfied | Quite satisfied          | Very satisfied           |
|--------------------------|--------------------------|------------------------------------|--------------------------|--------------------------|
| <input type="checkbox"/> | <input type="checkbox"/> | <input type="checkbox"/>           | <input type="checkbox"/> | <input type="checkbox"/> |

## SOME QUESTIONS ABOUT YOUR HEALTH

---

35. When was the first day of your last period? *(If you can't remember the exact date, please give simply the year and month)*

Year 20..... Month: ..... Day: .....

36. How much menstrual pain did you have with your most recent period?

|                          |                          |                                       |                          |                          |
|--------------------------|--------------------------|---------------------------------------|--------------------------|--------------------------|
| Severe pain              | Quite bad pain           | Neither severe nor insignificant pain | Mild pain                | Hardly any pain          |
| <input type="checkbox"/> | <input type="checkbox"/> | <input type="checkbox"/>              | <input type="checkbox"/> | <input type="checkbox"/> |

37. How old were you when you had your first menstruation? ..... years old

38. How long is your normal **menstrual cycle**? *(A menstrual cycle is the time between the first day of one period and the first day of the next)*

|                          |                          |                          |                          |                          |                          |                          |                          |                          |
|--------------------------|--------------------------|--------------------------|--------------------------|--------------------------|--------------------------|--------------------------|--------------------------|--------------------------|
| 20 days or less          | 21 – 25 days             | 26 days                  | 27 days                  | 28 days                  | 29 days                  | 30 days                  | 31 – 35 days             | 36 days or more          |
| <input type="checkbox"/> | <input type="checkbox"/> | <input type="checkbox"/> | <input type="checkbox"/> | <input type="checkbox"/> | <input type="checkbox"/> | <input type="checkbox"/> | <input type="checkbox"/> | <input type="checkbox"/> |

39. Do you have, or have you previously been diagnosed with the following disorders/illnesses?

*(Tick all relevant options)*

- |                                                                                 |                                                                             |
|---------------------------------------------------------------------------------|-----------------------------------------------------------------------------|
| <input type="checkbox"/> ADHD                                                   | <input type="checkbox"/> Heart condition                                    |
| <input type="checkbox"/> Allergy/hypersensitivity to a foodstuff                | <input type="checkbox"/> Hypertension/high blood pressure                   |
| <input type="checkbox"/> Asthma                                                 | <input type="checkbox"/> Chlamydia                                          |
| <input type="checkbox"/> Bipolar disorder                                       | <input type="checkbox"/> Bone pain                                          |
| <input type="checkbox"/> Depression                                             | <input type="checkbox"/> Kidney disorder                                    |
| <input type="checkbox"/> Diabetes                                               | <input type="checkbox"/> Polycystic ovary syndrome (PCOS)                   |
| <input type="checkbox"/> Endometriosis                                          | <input type="checkbox"/> Back pain                                          |
| <input type="checkbox"/> Epilepsy                                               | <input type="checkbox"/> Anxiety                                            |
| <input type="checkbox"/> Cervix Dysplasia (Pap smear)                           | <input type="checkbox"/> Eating disorders <i>(e.g. bulimia or anorexia)</i> |
| <input type="checkbox"/> Thyroid disease <i>(e.g. Hyper- or hypothyroidism)</i> |                                                                             |

40. Have you had any illnesses/disorders other than those listed in the previous question?

No       Yes, I have had the following illness(es)/disorder(s): .....

.....

41. Have you ever had an abdominal operation?  Yes  No
42. How is your general health **just now**?

|                          |                          |                          |                          |                          |
|--------------------------|--------------------------|--------------------------|--------------------------|--------------------------|
| Very good                | Quite good               | Neither good<br>nor bad  | Quite bad                | Very bad                 |
| <input type="checkbox"/> | <input type="checkbox"/> | <input type="checkbox"/> | <input type="checkbox"/> | <input type="checkbox"/> |

## PREVIOUS PREGNANCIES

---

43. a. Have you ever been pregnant (*include miscarriages and abortions*)?

Yes  No → *Go to question 44*

- b. How many times have you been pregnant (*include miscarriages and abortions*)?

|                          |                          |                          |                          |                          |                          |                          |                          |                          |
|--------------------------|--------------------------|--------------------------|--------------------------|--------------------------|--------------------------|--------------------------|--------------------------|--------------------------|
| 1 time                   | 2 times.                 | 3 times.                 | 4 times.                 | 5 times.                 | 6 times.                 | 7 times.                 | 8 times.                 | 9 or more<br>times.      |
| <input type="checkbox"/> | <input type="checkbox"/> | <input type="checkbox"/> | <input type="checkbox"/> | <input type="checkbox"/> | <input type="checkbox"/> | <input type="checkbox"/> | <input type="checkbox"/> | <input type="checkbox"/> |

- c. How old were you when you became pregnant for the first time (*include miscarriages and abortions*)?

..... years

- d. How many times have you had a miscarriage in months 0-6?

0 times.  1 time  2 times.  3 times.  4 times  5 times.  6 or more times.

- e. How many times have you had an abortion?

0 times  1 time  2 times.  3 times.  4 times.  5 times.  6 or more times.

- f. How many times have you had an ectopic pregnancy?

0 times  1 time  2 times.  3 times.  4 times.  5 times.  6 or more times.

44. a. Have you ever given birth to a child?  Yes  No → *Go to question 45*

|                                                     | 0                        | 1                        | 2                        | 3                        | 4                        | 5 or<br>more             |
|-----------------------------------------------------|--------------------------|--------------------------|--------------------------|--------------------------|--------------------------|--------------------------|
| b. If yes, how many?                                | <input type="checkbox"/> | <input type="checkbox"/> | <input type="checkbox"/> | <input type="checkbox"/> | <input type="checkbox"/> | <input type="checkbox"/> |
| c. How many were born alive?                        | <input type="checkbox"/> | <input type="checkbox"/> | <input type="checkbox"/> | <input type="checkbox"/> | <input type="checkbox"/> | <input type="checkbox"/> |
| d. How many were born more than 3 months too early? | <input type="checkbox"/> | <input type="checkbox"/> | <input type="checkbox"/> | <input type="checkbox"/> | <input type="checkbox"/> | <input type="checkbox"/> |
| e. How many were born with a deformation?           | <input type="checkbox"/> | <input type="checkbox"/> | <input type="checkbox"/> | <input type="checkbox"/> | <input type="checkbox"/> | <input type="checkbox"/> |
| f. How many biological children do you have today?  | <input type="checkbox"/> | <input type="checkbox"/> | <input type="checkbox"/> | <input type="checkbox"/> | <input type="checkbox"/> | <input type="checkbox"/> |

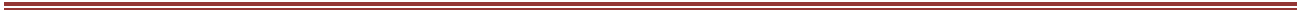

## CIRCUMSTANCES AROUND YOUR ON-GOING PREGNANCY ATTEMPT

***Below are some questions that concern the circumstances around your on-going attempt to become pregnant. By this we mean the time from when you actively started to try to get pregnant up to and including today's date.***

45. Since when have you and your present partner actively tried to get pregnant?

Years: ..... Months: .....

46. Who took **the initiative** to the decision that you should try to get pregnant?

- Just me                       Mostly me
- My partner and I equally
- Just my partner             Mostly my partner
- Another person or persons, describe: .....

47. Did you decide on a **time plan** within which you expected to get pregnant?

- Yes, I/we expected that I would get pregnant within ..... weeks / .....month(s)
- No

48. Have you used an ovulation test during this time that you have been trying to get pregnant?

- No                       Yes, I have used ovulation tests ..... times.

49. During your on-going attempt to get pregnant have you considered adopting a child?

- | Yes, very often          | Yes, a little            | Neither yes,<br>nor no   | No, not seriously        | No, Not at all           |
|--------------------------|--------------------------|--------------------------|--------------------------|--------------------------|
| <input type="checkbox"/> | <input type="checkbox"/> | <input type="checkbox"/> | <input type="checkbox"/> | <input type="checkbox"/> |

50. Have you been given personal advice about infertility or your on-going attempt to get pregnant from any of the following professionals? (*Tick all that are relevant*)

- Family doctor                       Specialist doctor                       Midwife
- Nurse                                       Dietician                                       Counsellor
- Other : .....
- No, I have not been given any advice about infertility or my on-going attempt to get pregnant

51. Have you, during the time from beginning your on-going attempt to get pregnant, taken any steps to improve your health as a preparation for getting pregnant? (Tick all that are relevant)

Taken folic acid

Stopped smoking

Reduced my smoking

Stopped using Swedish snuff tobacco (snus)

Reduced my use of 'snus'

Stopped drinking alcohol

Reduced my alcohol consumption

Stopped drinking coffee

Reduced my coffee consumption

Done more exercise

Done less exercise

Changed your medications

Eaten more healthily, describe: .....

Sought medical/health advice

Made other choices, describe: .....

***or***

I have not done any of the above

52. Where have you and/or your partner sought information about infertility or your on-going attempt to get pregnant? (Tick all that are relevant)

Maternity / Midwife Clinic

Other health clinic

Family, friends and acquaintances

Livsmedelsverket (Sweden's National Food Agency)

Folkhälsomyndigheten (Public Health Agency of Sweden)

Internet forums (*internet sites for: pregnancy, family life, growing people, parents*)

Health sites on internet (*e.g. 1177 Vårdguiden*)

Other internet sites:.....

Newspapers/magazines

Books

Other: .....

No, I have not sought information about infertility or my on-going attempt to get pregnant



## SOME QUESTIONS ABOUT YOU AND YOUR SITUATION

53. Tick the answer which best describes how you have been **this week**.

|                                                           |                                                            |                                                      |                                                |                                        |
|-----------------------------------------------------------|------------------------------------------------------------|------------------------------------------------------|------------------------------------------------|----------------------------------------|
| a. I have felt tense and nervous                          | Very often<br><input type="checkbox"/>                     | Often<br><input type="checkbox"/>                    | Rarely<br><input type="checkbox"/>             | Not at all<br><input type="checkbox"/> |
| b. I have a feeling something terrible is going to happen | Very strongly and unpleasantly<br><input type="checkbox"/> | Not so strongly just now<br><input type="checkbox"/> | Much less just now<br><input type="checkbox"/> | Not at all<br><input type="checkbox"/> |
| c. I worry about things                                   | Very often<br><input type="checkbox"/>                     | Often<br><input type="checkbox"/>                    | Rarely<br><input type="checkbox"/>             | Not at all<br><input type="checkbox"/> |
| d. I can sit still and feel relaxed                       | Very often<br><input type="checkbox"/>                     | Often<br><input type="checkbox"/>                    | Rarely<br><input type="checkbox"/>             | Not at all<br><input type="checkbox"/> |
| e. I feel worried, as if I had butterflies in my stomach  | Very often<br><input type="checkbox"/>                     | Often<br><input type="checkbox"/>                    | Rarely<br><input type="checkbox"/>             | Not at all<br><input type="checkbox"/> |
| f. I feel restless                                        | Very often<br><input type="checkbox"/>                     | Often<br><input type="checkbox"/>                    | Rarely<br><input type="checkbox"/>             | Not at all<br><input type="checkbox"/> |
| g. I get sudden panic attacks                             | Very often<br><input type="checkbox"/>                     | Often<br><input type="checkbox"/>                    | Rarely<br><input type="checkbox"/>             | Not at all<br><input type="checkbox"/> |

54. For the next 10 questions, tick the option which best describes how you have been feeling **this week**.

|                                                                                                                                                                                                                                                                              |                                                                                                                                                                                                                                                                                                                                                                                                   |
|------------------------------------------------------------------------------------------------------------------------------------------------------------------------------------------------------------------------------------------------------------------------------|---------------------------------------------------------------------------------------------------------------------------------------------------------------------------------------------------------------------------------------------------------------------------------------------------------------------------------------------------------------------------------------------------|
| <p>a. I have been able to laugh and see the bright side of life</p> <p><input type="checkbox"/> As normal</p> <p><input type="checkbox"/> Nearly as good as normal</p> <p><input type="checkbox"/> Much worse than normal</p> <p><input type="checkbox"/> Not at all</p>     | <p>f. Things have been getting on top of me</p> <p><input type="checkbox"/> Yes, most of the time I haven't been able to do anything at all</p> <p><input type="checkbox"/> Yes, sometimes I haven't been able to cope as well as usual</p> <p><input type="checkbox"/> No, mostly I have managed to cope quite well</p> <p><input type="checkbox"/> No, I've been able to do things as usual</p> |
| <p>b. I've been happy about things that have happened</p> <p><input type="checkbox"/> As much as normal</p> <p><input type="checkbox"/> Less than normal</p> <p><input type="checkbox"/> Much less than normal</p> <p><input type="checkbox"/> Not at all</p>                | <p>g. I've felt so unhappy that I've had problems sleeping</p> <p><input type="checkbox"/> Yes, very much so</p> <p><input type="checkbox"/> Yes, sometimes</p> <p><input type="checkbox"/> No, rarely</p> <p><input type="checkbox"/> No, never</p>                                                                                                                                              |
| <p>c. I've blamed myself too much when things have gone wrong</p> <p><input type="checkbox"/> Yes, most of the time</p> <p><input type="checkbox"/> Yes, sometimes</p> <p><input type="checkbox"/> Not often</p> <p><input type="checkbox"/> No, never</p>                   | <p>h. I have felt sad and miserable</p> <p><input type="checkbox"/> Yes, most of the time</p> <p><input type="checkbox"/> Yes, quite often</p> <p><input type="checkbox"/> No, rarely</p> <p><input type="checkbox"/> No, never</p>                                                                                                                                                               |
| <p>d. I have felt frightened and worried without any special reason</p> <p><input type="checkbox"/> No, Not at all</p> <p><input type="checkbox"/> Quite rarely</p> <p><input type="checkbox"/> Yes, sometimes</p> <p><input type="checkbox"/> Yes, very often</p>           | <p>i. I've felt unhappy and cried</p> <p><input type="checkbox"/> Yes, most of the time</p> <p><input type="checkbox"/> Yes, quite often</p> <p><input type="checkbox"/> Only once or twice</p> <p><input type="checkbox"/> Never</p>                                                                                                                                                             |
| <p>e. I have felt frightened and full of panic without any special reason</p> <p><input type="checkbox"/> Yes, very often</p> <p><input type="checkbox"/> Yes, sometimes</p> <p><input type="checkbox"/> No, quite rarely</p> <p><input type="checkbox"/> No, Not at all</p> | <p>j. I've had thoughts about hurting myself</p> <p><input type="checkbox"/> Yes, very often</p> <p><input type="checkbox"/> Yes, now and again</p> <p><input type="checkbox"/> Rarely</p> <p><input type="checkbox"/> Never</p>                                                                                                                                                                  |

55. During **the last month** how often have you ...

|                                                                                            | Never                    | Rarely                   | Some-<br>times           | Quite<br>often           | Very<br>often            |
|--------------------------------------------------------------------------------------------|--------------------------|--------------------------|--------------------------|--------------------------|--------------------------|
| a. ... been upset about something unexpected happening?                                    | <input type="checkbox"/> | <input type="checkbox"/> | <input type="checkbox"/> | <input type="checkbox"/> | <input type="checkbox"/> |
| b. ... felt you haven't had control over important issues in your life?                    | <input type="checkbox"/> | <input type="checkbox"/> | <input type="checkbox"/> | <input type="checkbox"/> | <input type="checkbox"/> |
| c. ... felt nervous and under stress?                                                      | <input type="checkbox"/> | <input type="checkbox"/> | <input type="checkbox"/> | <input type="checkbox"/> | <input type="checkbox"/> |
| d. ... felt capable of coping with personal problems?                                      | <input type="checkbox"/> | <input type="checkbox"/> | <input type="checkbox"/> | <input type="checkbox"/> | <input type="checkbox"/> |
| e. ... felt that things have turned out as you wanted?                                     | <input type="checkbox"/> | <input type="checkbox"/> | <input type="checkbox"/> | <input type="checkbox"/> | <input type="checkbox"/> |
| f. ... felt that you could deal with everything that has been needing to be done?          | <input type="checkbox"/> | <input type="checkbox"/> | <input type="checkbox"/> | <input type="checkbox"/> | <input type="checkbox"/> |
| g. ... felt you could cope with irritating moments in your life?                           | <input type="checkbox"/> | <input type="checkbox"/> | <input type="checkbox"/> | <input type="checkbox"/> | <input type="checkbox"/> |
| h. ... felt that you have been in control of things?                                       | <input type="checkbox"/> | <input type="checkbox"/> | <input type="checkbox"/> | <input type="checkbox"/> | <input type="checkbox"/> |
| i. ... felt angry about things that have happened and that have been outside your control? | <input type="checkbox"/> | <input type="checkbox"/> | <input type="checkbox"/> | <input type="checkbox"/> | <input type="checkbox"/> |
| j. ... felt that there have been so many problems that you haven't been able to cope?      | <input type="checkbox"/> | <input type="checkbox"/> | <input type="checkbox"/> | <input type="checkbox"/> | <input type="checkbox"/> |

## PREGNANCY IN GENERAL

*These questions are about how you feel about your ability to become pregnant. NB This is not a test of knowledge – we just want to know what you feel.*

56. What do you think is the average chance for a woman of your age to become pregnant if she has unprotected vaginal intercourse **while she is ovulating**?  
 ..... percent chance at the time of ovulation
57. What do you think is the average chance, at each attempt, for a woman of your age to become pregnant **with the help of test tube fertilisation**?  
 ..... percent chance at each attempt
58. At which age do you think women are most fertile? .....  
 years
59. At what age do you think that a woman's chance to become pregnant starts to decline **to some extent**? .....  
 years
60. At what age do you think that a woman's chance to become pregnant **clearly** starts declining? .....  
 years
61. Have you experienced the following as supportive or hindering you having children?

|                                              | Very<br>supportive       | Quite<br>supportive      | Neither<br>supportive<br>nor<br>hindering | Quite<br>hindering       | Very<br>hindering        | Not<br>relevant          |
|----------------------------------------------|--------------------------|--------------------------|-------------------------------------------|--------------------------|--------------------------|--------------------------|
| Your partner                                 | <input type="checkbox"/> | <input type="checkbox"/> | <input type="checkbox"/>                  | <input type="checkbox"/> | <input type="checkbox"/> | <input type="checkbox"/> |
| Your family                                  | <input type="checkbox"/> | <input type="checkbox"/> | <input type="checkbox"/>                  | <input type="checkbox"/> | <input type="checkbox"/> | <input type="checkbox"/> |
| Your friends                                 | <input type="checkbox"/> | <input type="checkbox"/> | <input type="checkbox"/>                  | <input type="checkbox"/> | <input type="checkbox"/> | <input type="checkbox"/> |
| Your age                                     | <input type="checkbox"/> | <input type="checkbox"/> | <input type="checkbox"/>                  | <input type="checkbox"/> | <input type="checkbox"/> | <input type="checkbox"/> |
| Your maturity                                | <input type="checkbox"/> | <input type="checkbox"/> | <input type="checkbox"/>                  | <input type="checkbox"/> | <input type="checkbox"/> | <input type="checkbox"/> |
| Your housing situation                       | <input type="checkbox"/> | <input type="checkbox"/> | <input type="checkbox"/>                  | <input type="checkbox"/> | <input type="checkbox"/> | <input type="checkbox"/> |
| Your career                                  | <input type="checkbox"/> | <input type="checkbox"/> | <input type="checkbox"/>                  | <input type="checkbox"/> | <input type="checkbox"/> | <input type="checkbox"/> |
| Your employment situation                    | <input type="checkbox"/> | <input type="checkbox"/> | <input type="checkbox"/>                  | <input type="checkbox"/> | <input type="checkbox"/> | <input type="checkbox"/> |
| Your finances                                | <input type="checkbox"/> | <input type="checkbox"/> | <input type="checkbox"/>                  | <input type="checkbox"/> | <input type="checkbox"/> | <input type="checkbox"/> |
| Which paternity benefits you are entitled to | <input type="checkbox"/> | <input type="checkbox"/> | <input type="checkbox"/>                  | <input type="checkbox"/> | <input type="checkbox"/> | <input type="checkbox"/> |

## SOME QUESTIONS ABOUT YOUR UPBRINGING

These questions are about your childhood. If the questions raise a need for you to talk to an outsider, you can ask your doctor who will show you how to find the help you need.

|     |                                                                                                              |                          |                          |                          |
|-----|--------------------------------------------------------------------------------------------------------------|--------------------------|--------------------------|--------------------------|
| 62. | During the <u>first 18 years of your life</u> :                                                              |                          | Yes                      | No                       |
|     | a. Did you live together with someone who had problems with alcohol consumption, or was indeed an alcoholic? | <input type="checkbox"/> | <input type="checkbox"/> | <input type="checkbox"/> |
|     | b. Did you live together with someone who used drugs?                                                        | <input type="checkbox"/> | <input type="checkbox"/> | <input type="checkbox"/> |
|     | c. Did your parents ever separate or divorce?                                                                | <input type="checkbox"/> | <input type="checkbox"/> | <input type="checkbox"/> |
|     | d. Was there anybody in your home who was depressed or mentally ill?                                         | <input type="checkbox"/> | <input type="checkbox"/> | <input type="checkbox"/> |
|     | e. Was there anybody in your home who tried to commit suicide                                                | <input type="checkbox"/> | <input type="checkbox"/> | <input type="checkbox"/> |
|     | f. Was there anybody in your home who was ever imprisoned?                                                   | <input type="checkbox"/> | <input type="checkbox"/> | <input type="checkbox"/> |

|     |                                                                                                                                             |                          |                          |                          |                          |                          |                          |
|-----|---------------------------------------------------------------------------------------------------------------------------------------------|--------------------------|--------------------------|--------------------------|--------------------------|--------------------------|--------------------------|
| 63. | During the <u>first 18 years of your life</u> :                                                                                             |                          | Never                    | Once or<br>twice         | Some-<br>times           | Often                    | Very<br>often            |
|     | a. How often did you feel that nobody in your family loved you or thought that you were important or special?                               | <input type="checkbox"/> | <input type="checkbox"/> | <input type="checkbox"/> | <input type="checkbox"/> | <input type="checkbox"/> | <input type="checkbox"/> |
|     | b. How often did you feel that people in your family didn't care about each other, weren't emotionally close and didn't support each other? | <input type="checkbox"/> | <input type="checkbox"/> | <input type="checkbox"/> | <input type="checkbox"/> | <input type="checkbox"/> | <input type="checkbox"/> |
|     | c. How often did you have too little to eat, had to wear dirty clothes and felt that nobody took care of you?                               | <input type="checkbox"/> | <input type="checkbox"/> | <input type="checkbox"/> | <input type="checkbox"/> | <input type="checkbox"/> | <input type="checkbox"/> |
|     | d. How often were your parents too inebriated with drink or drugs to look after you or take you to the doctor if necessary?                 | <input type="checkbox"/> | <input type="checkbox"/> | <input type="checkbox"/> | <input type="checkbox"/> | <input type="checkbox"/> | <input type="checkbox"/> |

|     |                                                                                                                                                                                                 |                          |                          |                          |                          |                          |
|-----|-------------------------------------------------------------------------------------------------------------------------------------------------------------------------------------------------|--------------------------|--------------------------|--------------------------|--------------------------|--------------------------|
| 64. | Sometimes parents or other adults hurt children. During your childhood, i.e. the <u>first 18 years of your life</u> , how often did a parent, a step-parent or other adult living in your home: |                          |                          |                          |                          |                          |
|     |                                                                                                                                                                                                 | Never                    | Once or twice            | Sometimes                | Often                    | Very often               |
| a.  | Swear at you, insult you or violate you?                                                                                                                                                        | <input type="checkbox"/> | <input type="checkbox"/> | <input type="checkbox"/> | <input type="checkbox"/> | <input type="checkbox"/> |
| b.  | Threatened to hit you or throw something at you, but never did?                                                                                                                                 | <input type="checkbox"/> | <input type="checkbox"/> | <input type="checkbox"/> | <input type="checkbox"/> | <input type="checkbox"/> |
| c.  | React in such a way that made you scared that you might be hurt physically?                                                                                                                     | <input type="checkbox"/> | <input type="checkbox"/> | <input type="checkbox"/> | <input type="checkbox"/> | <input type="checkbox"/> |
| d.  | Actually hit you, grab you, push you or throw something at you?                                                                                                                                 | <input type="checkbox"/> | <input type="checkbox"/> | <input type="checkbox"/> | <input type="checkbox"/> | <input type="checkbox"/> |
| e.  | Hit you so hard that it left marks or injured you?                                                                                                                                              | <input type="checkbox"/> | <input type="checkbox"/> | <input type="checkbox"/> | <input type="checkbox"/> | <input type="checkbox"/> |

|     |                                                                                                                                                                                                                                                              |                          |                          |                          |                          |                          |
|-----|--------------------------------------------------------------------------------------------------------------------------------------------------------------------------------------------------------------------------------------------------------------|--------------------------|--------------------------|--------------------------|--------------------------|--------------------------|
| 65. | Sometimes parents are physically violent with each other. During the <u>first 18 years of your life</u> how often did your father (or step-father) or your mother's boyfriend/partner do any of the following <b>things to your mother (or stepmother)</b> ? |                          |                          |                          |                          |                          |
|     |                                                                                                                                                                                                                                                              | Never                    | Once or twice            | Sometimes                | Often                    | Very often               |
| a.  | Pushed, grabbed, hit or threw something at her?                                                                                                                                                                                                              | <input type="checkbox"/> | <input type="checkbox"/> | <input type="checkbox"/> | <input type="checkbox"/> | <input type="checkbox"/> |
| b.  | Kicked, bit or hit her with his fists or something hard?                                                                                                                                                                                                     | <input type="checkbox"/> | <input type="checkbox"/> | <input type="checkbox"/> | <input type="checkbox"/> | <input type="checkbox"/> |
| c.  | Hit her repeatedly for at least several minutes?                                                                                                                                                                                                             | <input type="checkbox"/> | <input type="checkbox"/> | <input type="checkbox"/> | <input type="checkbox"/> | <input type="checkbox"/> |
| d.  | Threatened her with a knife or gun with the intention of hurting her?                                                                                                                                                                                        | <input type="checkbox"/> | <input type="checkbox"/> | <input type="checkbox"/> | <input type="checkbox"/> | <input type="checkbox"/> |

|     |                                                                                                                                                                                                                                                      |                          |                          |                          |                          |                          |
|-----|------------------------------------------------------------------------------------------------------------------------------------------------------------------------------------------------------------------------------------------------------|--------------------------|--------------------------|--------------------------|--------------------------|--------------------------|
| 66. | Sometimes parents are physically violent with each other. During the <u>first 18 years of your life</u> how often did your mother (or stepmother) or your father's girlfriend/partner do any of these <b>things to your father (or stepfather)</b> ? |                          |                          |                          |                          |                          |
|     |                                                                                                                                                                                                                                                      | Never                    | Once or twice            | Sometimes                | Often                    | Very often               |
| a.  | Pushed, grabbed, hit or threw something at him?                                                                                                                                                                                                      | <input type="checkbox"/> | <input type="checkbox"/> | <input type="checkbox"/> | <input type="checkbox"/> | <input type="checkbox"/> |
| b.  | Kicked, bit or hit him with her fists or something hard?                                                                                                                                                                                             | <input type="checkbox"/> | <input type="checkbox"/> | <input type="checkbox"/> | <input type="checkbox"/> | <input type="checkbox"/> |
| c.  | Hit him repeatedly for at least several minutes?                                                                                                                                                                                                     | <input type="checkbox"/> | <input type="checkbox"/> | <input type="checkbox"/> | <input type="checkbox"/> | <input type="checkbox"/> |
| d.  | Threatened him with a knife or gun with the intention of hurting him?                                                                                                                                                                                | <input type="checkbox"/> | <input type="checkbox"/> | <input type="checkbox"/> | <input type="checkbox"/> | <input type="checkbox"/> |

67. Some people, during the first 18 years of their life, have had sexual experiences with an adult or somebody at least 5 years older than themselves. These experiences may have involved a relative, family friend or a stranger. During the first 18 years of your life did any adult or older relative, family friend or stranger:

|                                                                                                                                                                | How old were you the first time this happened? | The first time it happened, was it against your will?       | How old were you the last time this happened? | Roughly how many times did it happen to you? | How many people did this to you? | What sex were those who did it?                                                                   |
|----------------------------------------------------------------------------------------------------------------------------------------------------------------|------------------------------------------------|-------------------------------------------------------------|-----------------------------------------------|----------------------------------------------|----------------------------------|---------------------------------------------------------------------------------------------------|
| a. Touch or caress your body in a sexual way?<br><br><input type="checkbox"/> Yes <input type="checkbox"/> No<br>If "Yes" →                                    | -----<br>years                                 | <input type="checkbox"/> Yes<br><input type="checkbox"/> No | -----<br>years                                | -----<br>times                               | -----<br>people                  | <input type="checkbox"/> male<br><input type="checkbox"/> female<br><input type="checkbox"/> both |
| b. Make you touch or caress their body in a sexual way?<br><br><input type="checkbox"/> Yes <input type="checkbox"/> No<br>If "Yes" →                          | -----<br>years                                 | <input type="checkbox"/> Yes<br><input type="checkbox"/> No | -----<br>years                                | -----<br>times                               | -----<br>people                  | <input type="checkbox"/> male<br><input type="checkbox"/> female<br><input type="checkbox"/> both |
| c. Try to have some kind of sexual intercourse (oral, anal or vaginal) with you?<br><br><input type="checkbox"/> Yes <input type="checkbox"/> No<br>If "Yes" → | -----<br>years                                 | <input type="checkbox"/> Yes<br><input type="checkbox"/> No | -----<br>years                                | -----<br>times                               | -----<br>people                  | <input type="checkbox"/> male<br><input type="checkbox"/> female<br><input type="checkbox"/> both |
| d. Succeed in having sexual intercourse (oral, anal or vaginal) with you?<br><br><input type="checkbox"/> Yes <input type="checkbox"/> No<br>If "Yes" →        | -----<br>years                                 | <input type="checkbox"/> Yes<br><input type="checkbox"/> No | -----<br>years                                | -----<br>times                               | -----<br>people                  | <input type="checkbox"/> male<br><input type="checkbox"/> female<br><input type="checkbox"/> both |

68. Did you find the questions about your childhood (questions 62-67) unpleasant to answer?

- Yes, I don't want to answer
- Yes, but it feels alright to answer
- No, it was alright to answer them
- Don't know/Have no opinion







Encrypted key:.....
